# Supplementary material
Source: PubMed Central journal article supplement (PMC3914615)
Supplement: 02e6ee4a5f7cf8655ed4e7491a7217bd_genetics.113.157503-3.pdf [file 02e6ee4a5f7cf8655ed4e7491a7217bd_genetics.113.157503-3.pdf]

|            |                 |                                                                                                                                                                                                                                                                                                                                                                                                                                                                                                                                                                                                                                                                                                                                                                                                                                                            |                                                                                                                                                                                                                                                                                                                                                                                                                                                      |
|------------|-----------------|------------------------------------------------------------------------------------------------------------------------------------------------------------------------------------------------------------------------------------------------------------------------------------------------------------------------------------------------------------------------------------------------------------------------------------------------------------------------------------------------------------------------------------------------------------------------------------------------------------------------------------------------------------------------------------------------------------------------------------------------------------------------------------------------------------------------------------------------------------|------------------------------------------------------------------------------------------------------------------------------------------------------------------------------------------------------------------------------------------------------------------------------------------------------------------------------------------------------------------------------------------------------------------------------------------------------|
|            |                 | arthritis Systemic lupus erythematosus Multiple sclerosis Multiple sclerosis Ulcerative colitis Multiple sclerosis Rheumatoid arthritis Arthritis (juvenile idiopathic) Rheumatoid arthritis Type 1 diabetes Rheumatoid arthritis Response to ximelagatran treatment                                                                                                                                                                                                                                                                                                                                                                                                                                                                                                                                                                                       |                                                                                                                                                                                                                                                                                                                                                                                                                                                      |
|            | <i>ITIH4</i>    | Ulcerative colitis Immune reponse to smallpox (secreted IL-2) Schizophrenia Bipolar disorder                                                                                                                                                                                                                                                                                                                                                                                                                                                                                                                                                                                                                                                                                                                                                               | rs9847710-C rs17331151-A rs2239547-? rs736408-C                                                                                                                                                                                                                                                                                                                                                                                                      |
| <b>FAT</b> |                 |                                                                                                                                                                                                                                                                                                                                                                                                                                                                                                                                                                                                                                                                                                                                                                                                                                                            |                                                                                                                                                                                                                                                                                                                                                                                                                                                      |
|            | <i>CDK6</i>     | White blood cell types White blood cell count Height Height Rheumatoid arthritis Height Height Height                                                                                                                                                                                                                                                                                                                                                                                                                                                                                                                                                                                                                                                                                                                                                      | rs445-C rs445-T rs42235-T rs2282978-? rs42041-G rs2282978-C rs2040494-C rs2282978-C                                                                                                                                                                                                                                                                                                                                                                  |
|            | <i>FGA</i>      | Venous thromboembolism Fibrinogen D-dimer levels Fibrinogen                                                                                                                                                                                                                                                                                                                                                                                                                                                                                                                                                                                                                                                                                                                                                                                                | rs7659024-A rs6050-C rs13109457-A rs6056-A                                                                                                                                                                                                                                                                                                                                                                                                           |
|            | <i>IRF5</i>     | Systemic lupus erythematosus Ulcerative colitis Systemic lupus erythematosus Systemic sclerosis Systemic sclerosis Systemic sclerosis Systemic sclerosis Systemic sclerosis Primary biliary cirrhosis Systemic lupus erythematosus Systemic lupus erythematosus Ulcerative colitis Primary biliary cirrhosis Rheumatoid arthritis Systemic sclerosis Systemic lupus erythematosus Systemic lupus erythematosus Systemic lupus erythematosus                                                                                                                                                                                                                                                                                                                                                                                                                | rs729302-A rs4728142-A rs729302-A rs10488631-? rs10488631-? rs10488631-? rs10488631-? rs10488631-C rs12531711-G rs12531711-G rs10488631-C rs4728142-A rs10488631-C rs10488631-C rs10488631-C rs4728142-A rs12537284-A rs10488631-C                                                                                                                                                                                                                   |
|            | <i>IKZF1</i>    | Systemic lupus erythematosus Red blood cell traits Inflammatory bowel disease Crohn's disease Systemic lupus erythematosus Mean corpuscular volume Acute lymphoblastic leukemia (childhood) Acute lymphoblastic leukemia (childhood) Hippocampal atrophy                                                                                                                                                                                                                                                                                                                                                                                                                                                                                                                                                                                                   | rs10276619-G rs12718598-T rs1456896-T rs1456896-T rs4917014-A rs12718597-A rs4132601-C rs11978267-G rs10276619-?                                                                                                                                                                                                                                                                                                                                     |
|            | <i>MEGF9</i>    | Response to statin therapy                                                                                                                                                                                                                                                                                                                                                                                                                                                                                                                                                                                                                                                                                                                                                                                                                                 | rs16909449-C                                                                                                                                                                                                                                                                                                                                                                                                                                         |
|            | <i>FUT4</i>     | Response to angiotensin II receptor blocker therapy Response to angiotensin II receptor blocker therapy (opposite direction w/ diuretic therapy)                                                                                                                                                                                                                                                                                                                                                                                                                                                                                                                                                                                                                                                                                                           | rs11020821-C rs11020821-C                                                                                                                                                                                                                                                                                                                                                                                                                            |
|            | <i>KCTD8</i>    | Response to amphetamines Anticoagulant levels                                                                                                                                                                                                                                                                                                                                                                                                                                                                                                                                                                                                                                                                                                                                                                                                              | rs17641529-? rs13130255-?                                                                                                                                                                                                                                                                                                                                                                                                                            |
|            | <i>PAX8</i>     | Renal function-related traits (BUN)                                                                                                                                                                                                                                                                                                                                                                                                                                                                                                                                                                                                                                                                                                                                                                                                                        | <b>rs11123170-G</b>                                                                                                                                                                                                                                                                                                                                                                                                                                  |
|            | <i>COG6</i>     | Psoriasis                                                                                                                                                                                                                                                                                                                                                                                                                                                                                                                                                                                                                                                                                                                                                                                                                                                  | rs7993214-?                                                                                                                                                                                                                                                                                                                                                                                                                                          |
|            | <i>TRPC4AP</i>  | Prothrombin time                                                                                                                                                                                                                                                                                                                                                                                                                                                                                                                                                                                                                                                                                                                                                                                                                                           | rs2295888-A                                                                                                                                                                                                                                                                                                                                                                                                                                          |
|            | <i>BRWD2</i>    | Obesity-related traits Visceral fat                                                                                                                                                                                                                                                                                                                                                                                                                                                                                                                                                                                                                                                                                                                                                                                                                        | rs2919009-A rs7085142-T                                                                                                                                                                                                                                                                                                                                                                                                                              |
|            | <i>IL1RN</i>    | Obesity-related traits C-reactive protein Protein quantitative trait loci                                                                                                                                                                                                                                                                                                                                                                                                                                                                                                                                                                                                                                                                                                                                                                                  | rs4252023-A rs6734238-G rs6761276-?                                                                                                                                                                                                                                                                                                                                                                                                                  |
|            | <i>DAPL1</i>    | Obesity-related traits                                                                                                                                                                                                                                                                                                                                                                                                                                                                                                                                                                                                                                                                                                                                                                                                                                     | rs16843372-G                                                                                                                                                                                                                                                                                                                                                                                                                                         |
|            | <i>PTER</i>     | Obesity                                                                                                                                                                                                                                                                                                                                                                                                                                                                                                                                                                                                                                                                                                                                                                                                                                                    | rs10508503-C                                                                                                                                                                                                                                                                                                                                                                                                                                         |
|            | <i>ITGA4</i>    | Monocyte count White blood cell types Celiac disease                                                                                                                                                                                                                                                                                                                                                                                                                                                                                                                                                                                                                                                                                                                                                                                                       | rs2124440-G rs12988934-T rs13010713-G                                                                                                                                                                                                                                                                                                                                                                                                                |
|            | <i>DSEL</i>     | Major depressive disorder Cognitive performance                                                                                                                                                                                                                                                                                                                                                                                                                                                                                                                                                                                                                                                                                                                                                                                                            | rs17077540-G rs2124349-?                                                                                                                                                                                                                                                                                                                                                                                                                             |
|            | <i>HLA-DRB1</i> | Lymphoma Epstein-Barr virus immune response (EBNA-1) Leishmaniasis (visceral) Systemic lupus erythematosus Crohn's disease Schizophrenia Ulcerative colitis Hepatocellular carcinoma Immune response to anthrax vaccine  Hypothyroidism IgA nephropathy Multiple sclerosis Nodular sclerosis Hodgkin lymphoma Nodular sclerosis Hodgkin lymphoma Systemic sclerosis Response to interferon beta therapy Rheumatoid arthritis Nephropathy Ulcerative colitis Rheumatoid arthritis Immunoglobulin A  Immunoglobulin A  Lumiracoxib-related liver injury Rheumatoid arthritis Rheumatoid arthritis Systemic lupus erythematosus Multiple sclerosis Multiple sclerosis Ulcerative colitis Multiple sclerosis Rheumatoid arthritis Arthritis (juvenile idiopathic) Rheumatoid arthritis Type 1 diabetes Rheumatoid arthritis Response to ximelagatran treatment | rs9268853-C rs477515-T rs9271858-G rs9270984-T rs7765379-G rs4530903-? rs6927022-A rs9272105-A rs3104402-A rs3129720-C rs660895-G rs3129889-G 5-SNP haplotype 6 5-SNP haplotype 3 rs3129763-? rs9272105-A rs7765379-? rs9275956-? rs9268853-T rs7765379-? rs9271366-? rs2187668-A rs3129900-? rs13192471-G rs6910071-G rs9271100-? rs9271366-G rs3135388-A rs2395185-? rs3129934-T rs6457620-? rs2395148-? rs660895-? rs2647044-A rs615672-? DRB1*07 |
|            | <i>DLG4</i>     | Liver enzyme levels (alkaline phosphatase)                                                                                                                                                                                                                                                                                                                                                                                                                                                                                                                                                                                                                                                                                                                                                                                                                 | rs314253-C                                                                                                                                                                                                                                                                                                                                                                                                                                           |
|            | <i>IL8</i>      | Inflammatory bowel disease                                                                                                                                                                                                                                                                                                                                                                                                                                                                                                                                                                                                                                                                                                                                                                                                                                 | rs2472649-G                                                                                                                                                                                                                                                                                                                                                                                                                                          |
|            | <i>KCTD10</i>   | HDL cholesterol                                                                                                                                                                                                                                                                                                                                                                                                                                                                                                                                                                                                                                                                                                                                                                                                                                            | rs9943753-G                                                                                                                                                                                                                                                                                                                                                                                                                                          |
|            | <i>PTCHD3</i>   | Fasting insulin-related traits (interaction with BMI)                                                                                                                                                                                                                                                                                                                                                                                                                                                                                                                                                                                                                                                                                                                                                                                                      | rs1334893-?                                                                                                                                                                                                                                                                                                                                                                                                                                          |
|            | <i>ADH4</i>     | Esophageal cancer (alcohol interaction)                                                                                                                                                                                                                                                                                                                                                                                                                                                                                                                                                                                                                                                                                                                                                                                                                    | rs3805322-?                                                                                                                                                                                                                                                                                                                                                                                                                                          |
|            | <i>SLC39A8</i>  | Diastolic blood pressure Hypertension Systolic blood pressure Blood pressure Body mass index HDL cholesterol                                                                                                                                                                                                                                                                                                                                                                                                                                                                                                                                                                                                                                                                                                                                               | rs13107325-T rs13107325-T rs13107325-T rs13107325-T rs13107325-T rs13107325-T                                                                                                                                                                                                                                                                                                                                                                        |
|            | <i>LZTS1</i>    | Dental caries Dental caries Major depressive disorder (broad)                                                                                                                                                                                                                                                                                                                                                                                                                                                                                                                                                                                                                                                                                                                                                                                              | rs4922199-? rs10111661-? rs1106634-A                                                                                                                                                                                                                                                                                                                                                                                                                 |
|            | <i>STMN2</i>    | Creutzfeldt-Jakob disease                                                                                                                                                                                                                                                                                                                                                                                                                                                                                                                                                                                                                                                                                                                                                                                                                                  | rs1460163-A                                                                                                                                                                                                                                                                                                                                                                                                                                          |
|            | <i>EIF3H</i>    | Corneal curvature Colorectal cancer Colorectal cancer                                                                                                                                                                                                                                                                                                                                                                                                                                                                                                                                                                                                                                                                                                                                                                                                      | rs11987235-A rs16892766-? rs16892766-A                                                                                                                                                                                                                                                                                                                                                                                                               |
|            | <i>SFTPD</i>    | Chronic obstructive pulmonary disease-related biomarkers Chronic obstructive pulmonary disease-related biomarkers                                                                                                                                                                                                                                                                                                                                                                                                                                                                                                                                                                                                                                                                                                                                          | rs7078012-T rs3923564-G                                                                                                                                                                                                                                                                                                                                                                                                                              |
|            | <i>WDR41</i>    | Caudate nucleus volume                                                                                                                                                                                                                                                                                                                                                                                                                                                                                                                                                                                                                                                                                                                                                                                                                                     | <b>rs163030-A</b>                                                                                                                                                                                                                                                                                                                                                                                                                                    |
|            | <i>HLA-DPB1</i> | Aspirin exacerbated respiratory disease in asthmatics Hepatitis B (viral clearance) Hepatitis B (viral)                                                                                                                                                                                                                                                                                                                                                                                                                                                                                                                                                                                                                                                                                                                                                    | rs1042151-G rs9277535-G rs9277535-G rs9277535-? rs987870-? rs9277535-                                                                                                                                                                                                                                                                                                                                                                                |

|             |               |                                                                                                                                                                           |                                                                                                                                            |
|-------------|---------------|---------------------------------------------------------------------------------------------------------------------------------------------------------------------------|--------------------------------------------------------------------------------------------------------------------------------------------|
|             |               | clearance) Hepatitis B vaccine response Systemic sclerosis Hepatitis B Nephropathy Hepatitis B                                                                            | G rs1883414-? rs9277535-G                                                                                                                  |
|             | <i>LDHC</i>   | Amyloid A Levels                                                                                                                                                          | rs2896526-G                                                                                                                                |
| <b>SKIN</b> |               |                                                                                                                                                                           |                                                                                                                                            |
|             | <i>LTBP3</i>  | Urate levels Non-alcoholic fatty liver disease histology (lobular)                                                                                                        | rs642803-T rs6591182-A                                                                                                                     |
|             | <i>PAX8</i>   | Renal function-related traits (BUN)                                                                                                                                       | <b>rs11123170-G</b>                                                                                                                        |
|             | <i>ACTC1</i>  | Prostate cancer (gene x gene interaction) Refractive error                                                                                                                | rs543686-? rs634990-C                                                                                                                      |
|             | <i>ACCN1</i>  | Obesity-related traits vWF and FVIII levels                                                                                                                               | rs17808461-A rs1354492-A                                                                                                                   |
|             | <i>SOX5</i>   | Non-obstructive azoospermia Systemic sclerosis Systemic sclerosis Response to statin therapy Response to antipsychotic treatment PR interval AIDS                         | rs10842262-? rs11047102-? rs11047102-? rs7979575-C rs1464500-? rs11047543-A rs1522232-C                                                    |
|             | <i>HERC6</i>  | Metabolite levels                                                                                                                                                         | rs1440581-?                                                                                                                                |
|             | <i>WDR41</i>  | Caudate nucleus volume                                                                                                                                                    | <b>rs163030-A</b>                                                                                                                          |
|             | <i>PKD1L2</i> | Attention deficit hyperactivity disorder and conduct disorder                                                                                                             | rs4889240-T                                                                                                                                |
|             | <i>ZNF365</i> | Atopic dermatitis Crohn's disease Breast size Crohn's disease Intelligence Ewing sarcoma Breast cancer Mammographic density Crohn's disease Breast cancer Crohn's disease | rs10995251-C rs10761659-G rs7089814-C rs7076156-G rs10995170-? rs224278-C rs10822013-T rs10995190-A rs10761659-G rs10995190-G rs10995271-C |
|             | <i>PECR</i>   | Alcohol dependence                                                                                                                                                        | rs7590720-G                                                                                                                                |
