# Supplementary material
Source: PubMed Central journal article supplement (PMC3914615)
Supplement: 4df1107bfe376387705e5a769f196dbb_genetics.113.157503-1.pdf [file 4df1107bfe376387705e5a769f196dbb_genetics.113.157503-1.pdf]

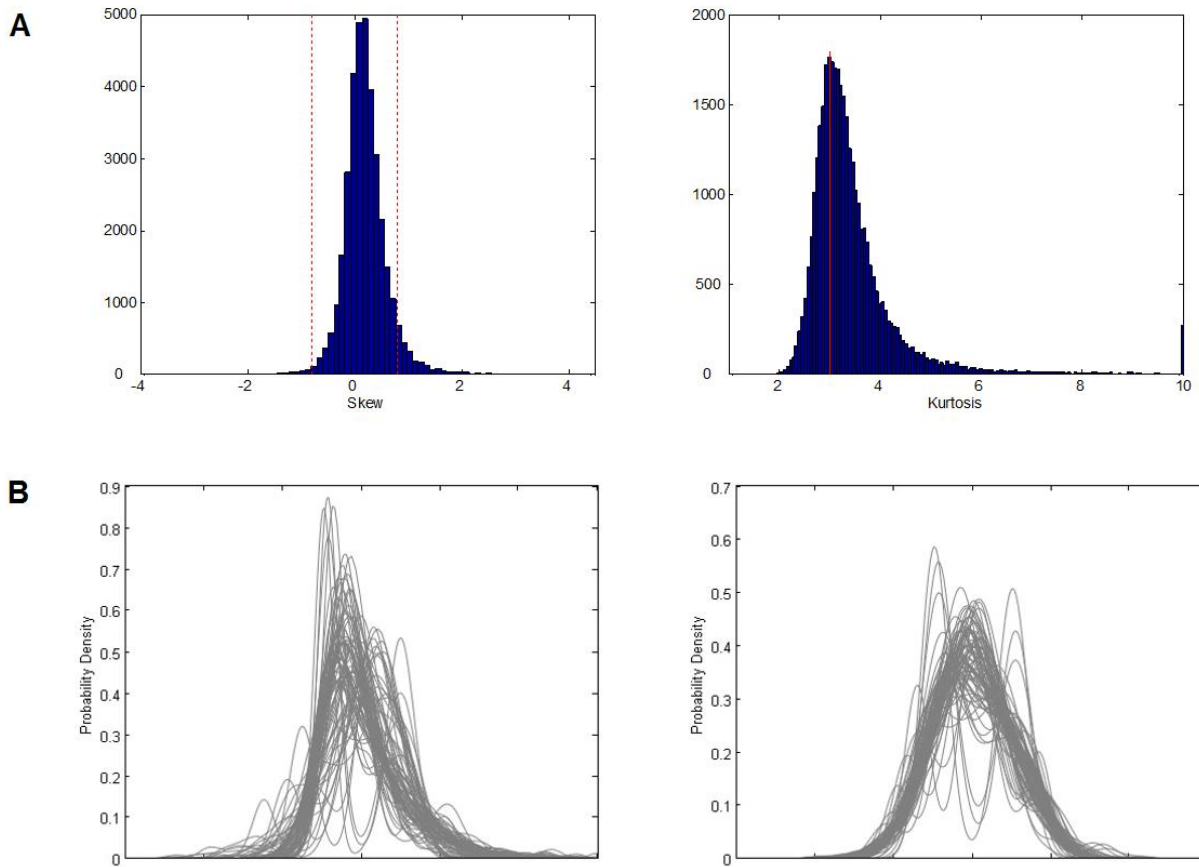

**Figure S1** Normality of expression data measured in LCLs. **(A)** Distributions of skewness and kurtosis. Red dashed lines indicate -0.8 and +0.8 skewness; red solid line indicates kurtosis = 3. **(B)** Profile distributions of expression data for selected probes (i.e., probes involved in evQTLs). (Left) Quantile-normalized expression data; (Right) Box-Cox normalized expression data.



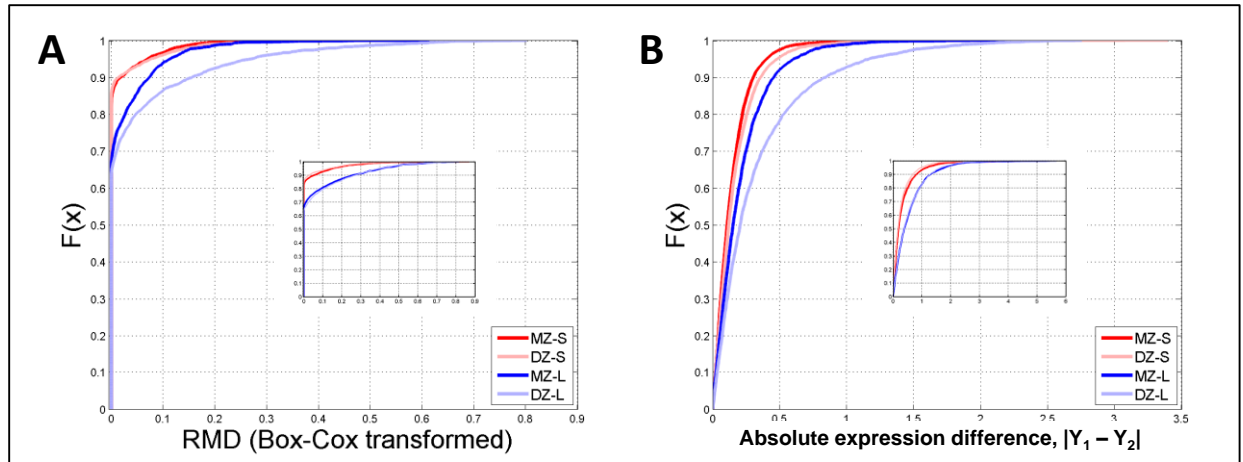

**Figure S3** Comparison between results of the CDF analysis for the expression difference between twin pairs in evQTL genes. **(A)** Results obtained using RMD of Box-Cox normalized  $\log_2$ -transformed data between twin pairs. **(B)** Results obtained using absolute difference of  $\log_2$ -transformed data between twin pairs.

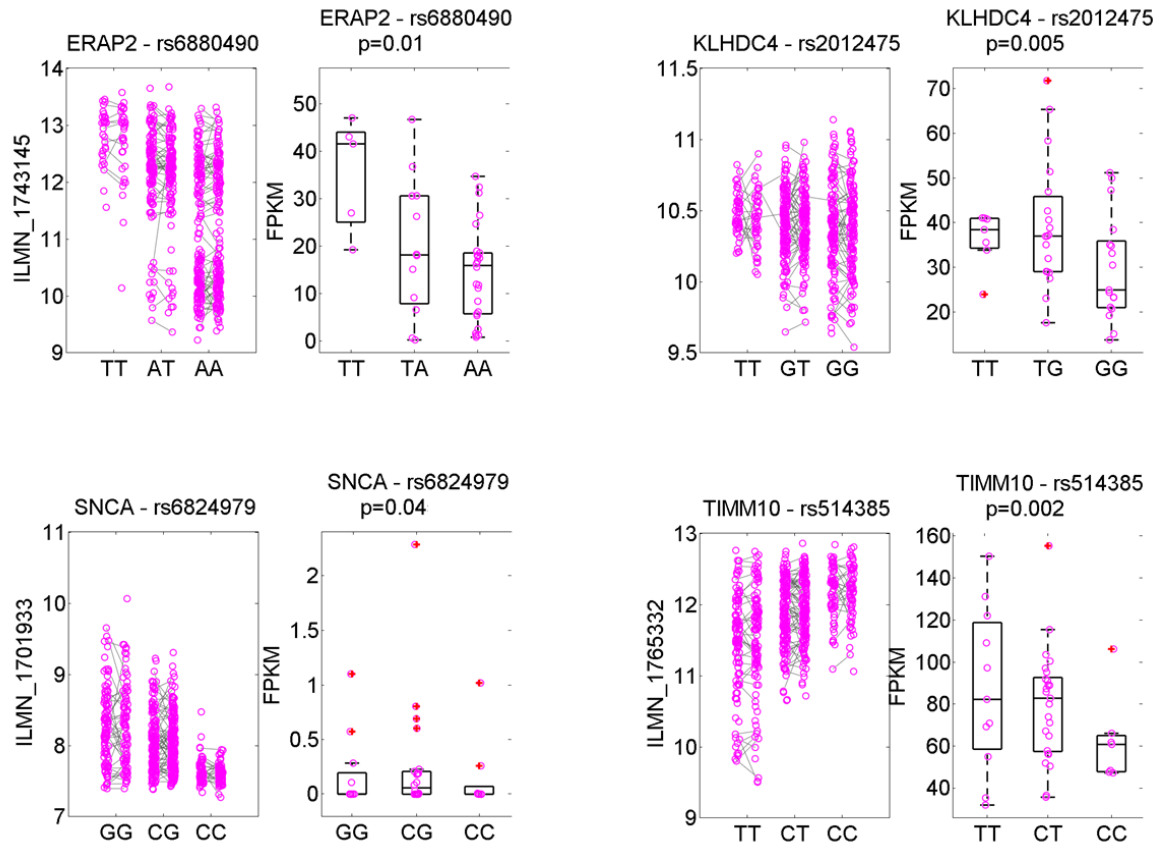

**Figure S4** Comparison between eQTLs depicted using TwinsUK samples (left) and those of the same gene-SNP pairs depicted using RNA-seq data (MONTGOMERY et al. 2010) and the 1,000 Genomes Project genotype data (THE-1000-GENOMES-PROJECT-CONSORTIUM et al. 2012) (right). *P*-value of Levene's test for the equality of variances for expression levels calculated for two homozygous genotype groups is shown in the subtitle of the right panel in each figure.

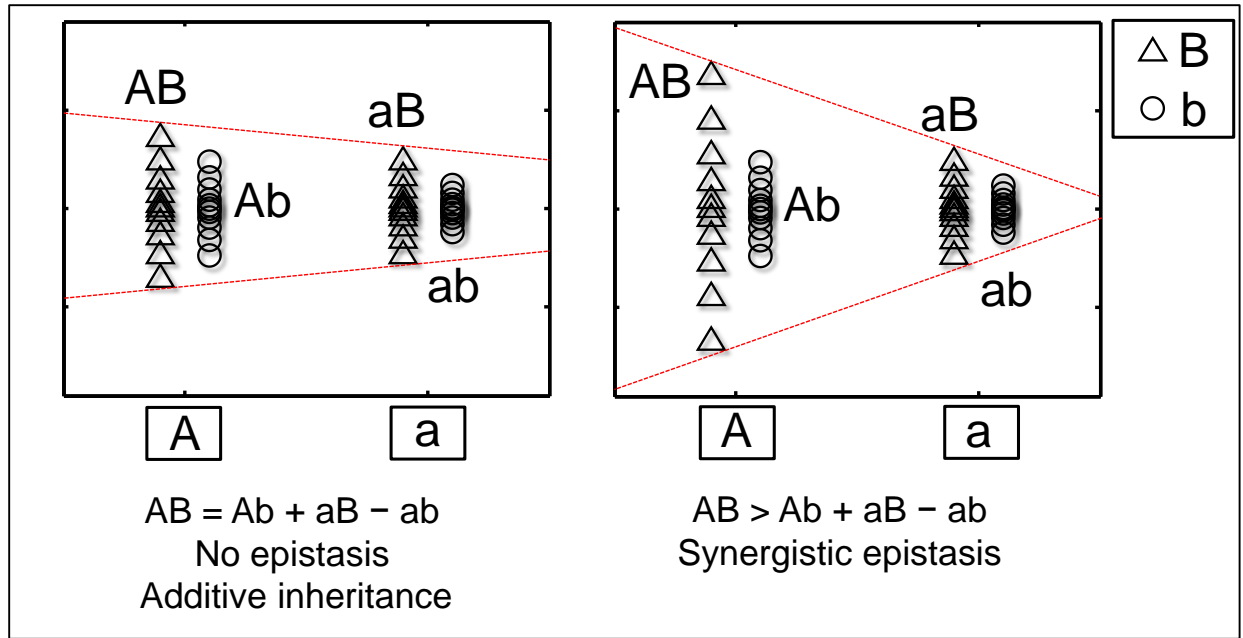

**Figure S5** Schematic shows that both additive (left) and epistatic (right) effects reate similar evQTL signals. “A” and “a” are two alleles of evSNP, while “B” and “b” are alleles of interacting SNP.

**Table S1** List of evQTLs detected in LCL, skin, and fat tissues.

| Tissue     |    | Gene             | # of <i>cis</i> -evQTL SNPs | Representative evQTL SNP | Alleles | Allele associated with larger expression variance | Ancestral allele |
|------------|----|------------------|-----------------------------|--------------------------|---------|---------------------------------------------------|------------------|
| <b>LCL</b> |    |                  |                             |                          |         |                                                   |                  |
|            | 1  | <i>AGTPBP1</i>   | 61                          | rs7847905                | T/C     | C                                                 | T                |
|            | 2  | <i>ALG11</i>     | 171                         | rs9526819                | G/A     | G                                                 | A                |
|            | 3  | <i>ATP13A1</i>   | 108                         | rs4808964                | C/A     | C                                                 | A                |
|            | 4  | <i>AXIN2</i>     | 2                           | rs740026                 | G/A     | A                                                 | G                |
|            | 5  | <i>BBS2</i>      | 41                          | rs14306                  | C/A     | A                                                 | G                |
|            | 6  | <i>BRWD2</i>     | 43                          | rs729704                 | T/C     | T                                                 | T                |
|            | 7  | <i>BTN3A2</i>    | 107                         | rs742090                 | C/A     | A                                                 | G                |
|            | 8  | <i>C12ORF28</i>  | 173                         | rs775439                 | G/A     | A                                                 | A                |
|            | 9  | <i>C12ORF54</i>  | 27                          | rs2731094                | T/C     | C                                                 | T                |
|            | 10 | <i>C16ORF30</i>  | 15                          | rs2076441                | G/C     | C                                                 | G                |
|            | 11 | <i>C17ORF97</i>  | 2                           | rs6565724                | T/C     | T                                                 | C                |
|            | 12 | <i>C7ORF28B</i>  | 3                           | rs10242703               | G/A     | A                                                 | A                |
|            | 13 | <i>CAPN11</i>    | 1                           | rs6938938                | G/A     | G                                                 | G                |
|            | 14 | <i>CDCP1</i>     | 3                           | rs6441894                | T/C     | C                                                 | T                |
|            | 15 | <i>CDO1</i>      | 21                          | rs698366                 | T/G     | T                                                 | C                |
|            | 16 | <i>CHST3</i>     | 11                          | rs4148929                | C/A     | C                                                 | C                |
|            | 17 | <i>COPG2</i>     | 38                          | rs12706942               | G/C     | C                                                 | G                |
|            | 18 | <i>CORO2A</i>    | 12                          | rs12351801               | T/C     | T                                                 | C                |
|            | 19 | <i>COX4NB</i>    | 24                          | rs301164                 | T/C     | C                                                 | C                |
|            | 20 | <i>CPA4</i>      | 74                          | rs6953940                | G/A     | A                                                 | G                |
|            | 21 | <i>CPNE1</i>     | 205                         | rs224354                 | G/C     | G                                                 | C                |
|            | 22 | <i>DDIT4L</i>    | 64                          | rs2866194                | G/A     | A                                                 | A                |
|            | 23 | <i>EEF1G</i>     | 6                           | rs1058678                | T/C     | C                                                 | A                |
|            | 24 | <i>EIF5A</i>     | 1                           | rs7220464                | T/G     | T                                                 | G                |
|            | 25 | <i>EMR1</i>      | 2                           | rs4807916                | T/C     | C                                                 | C                |
|            | 26 | <i>ERAP2</i>     | 2                           | rs6880490                | T/A     | A                                                 | T                |
|            | 27 | <i>FLJ10916</i>  | 15                          | rs4246598                | C/A     | A                                                 | C                |
|            | 28 | <i>GAD1</i>      | 1                           | rs13007861               | C/A     | C                                                 | C                |
|            | 29 | <i>GDA</i>       | 19                          | rs7019060                | G/A     | A?                                                | G                |
|            | 30 | <i>GOLPH4</i>    | 1                           | rs13100726               | G/A     | G                                                 | A                |
|            | 31 | <i>HCG22</i>     | 100                         | rs1064191                | T/C     | C                                                 | G                |
|            | 32 | <i>HCLS1</i>     | 2                           | rs4472078                | T/C     | T                                                 | G                |
|            | 33 | <i>HEY2</i>      | 36                          | rs628009                 | T/G     | G?                                                | A                |
|            | 34 | <i>HLA-DPB1</i>  | 59                          | rs9277341                | T/C     | T                                                 | C                |
|            | 35 | <i>HLA-DRB1</i>  | 27                          | rs9272723                | T/C     | C                                                 | T                |
|            | 36 | <i>HMHB1</i>     | 3                           | rs17100739               | G/A     | A                                                 | G                |
|            | 37 | <i>HYAL4</i>     | 8                           | rs12674456               | T/C     | T                                                 | T                |
|            | 38 | <i>IKZF1</i>     | 14                          | rs7789635                | T/C     | C                                                 | T                |
|            | 39 | <i>IPO8</i>      | 32                          | rs1371053                | T/C     | C                                                 | C                |
|            | 40 | <i>IRF5</i>      | 3                           | rs10156169               | G/A     | A                                                 | G                |
|            | 41 | <i>ITIH4</i>     | 26                          | rs2240915                | T/A     | T                                                 | T                |
|            | 42 | <i>KANK1</i>     | 17                          | rs2361106                | G/A     | G                                                 | A                |
|            | 43 | <i>KLHDC4</i>    | 2                           | rs2012475                | T/G     | G                                                 | T                |
|            | 44 | <i>LDHC</i>      | 19                          | rs3993291                | T/C     | T                                                 | C                |
|            | 45 | <i>LEMD3</i>     | 77                          | rs11175680               | G/C     | G                                                 | A                |
|            | 46 | <i>LOC440160</i> | 8                           | rs12052294               | G/A     | A                                                 | G                |
|            | 47 | <i>LOC642290</i> | 1                           | rs7255207                | T/C     | T                                                 | C                |
|            | 48 | <i>LOC648453</i> | 3                           | rs17753176               | T/A     | A                                                 | A                |
|            | 49 | <i>LOC650263</i> | 44                          | rs726920                 | G/C     | G                                                 | G                |
|            | 50 | <i>LOC650557</i> | 445                         | rs1980495                | C/A     | C                                                 | G                |
|            | 51 | <i>LTBR</i>      | 3                           | rs2364484                | C/A     | A                                                 | A                |
|            | 52 | <i>MED4</i>      | 53                          | rs9534912                | T/C     | T                                                 | C                |
|            | 53 | <i>MFF</i>       | 29                          | rs7573035                | C/A     | A                                                 | A                |
|            | 54 | <i>MGAT4A</i>    | 4                           | rs13032507               | C/A     | C                                                 | A                |
|            | 55 | <i>MMRN1</i>     | 3                           | rs7693616                | T/G     | G                                                 | T                |

|             |    |                  |     |            |     |   |   |
|-------------|----|------------------|-----|------------|-----|---|---|
|             | 56 | <i>MOCOS</i>     | 5   | rs1893269  | G/C | C | C |
|             | 57 | <i>MTERFD2</i>   | 16  | rs3815291  | C/A | C | A |
|             | 58 | <i>MTRR</i>      | 32  | rs327588   | G/C | C | G |
|             | 59 | <i>MXRA7</i>     | 30  | rs11077850 | T/C | T | C |
|             | 60 | <i>MYEOV</i>     | 24  | rs7939250  | G/A | G | A |
|             | 61 | <i>MYH11</i>     | 18  | rs3851702  | T/C | C | G |
|             | 62 | <i>N4BP2</i>     | 1   | rs6824761  | C/A | A | A |
|             | 63 | <i>NLRP2</i>     | 5   | rs11667481 | G/A | A | G |
|             | 64 | <i>NMNAT3</i>    | 21  | rs4367021  | C/A | A | C |
|             | 65 | <i>NUDT2</i>     | 15  | rs1337593  | T/C | T | C |
|             | 66 | <i>OAS1</i>      | 70  | rs1293742  | T/C | T | A |
|             | 67 | <i>PAX8</i>      | 4   | rs2863243  | T/C | C | C |
|             | 68 | <i>PGM5</i>      | 52  | rs12685375 | T/C | C | C |
|             | 69 | <i>PHACS</i>     | 4   | rs7928485  | T/C | T | T |
|             | 70 | <i>PILRB</i>     | 2   | rs5015756  | T/C | T | C |
|             | 71 | <i>PJA2</i>      | 27  | rs12719109 | T/C | C | T |
|             | 72 | <i>PLXDC2</i>    | 3   | rs2038912  | T/C | T | C |
|             | 73 | <i>PPIC</i>      | 30  | rs30063    | G/A | G | T |
|             | 74 | <i>PPIL3</i>     | 2   | rs3731714  | T/C | T | G |
|             | 75 | <i>PRPF31</i>    | 19  | rs254259   | T/C | C | A |
|             | 76 | <i>PTER</i>      | 8   | rs7913889  | G/A | A | C |
|             | 77 | <i>RAMP1</i>     | 10  | rs7578855  | T/C | T | T |
|             | 78 | <i>RGS17</i>     | 19  | rs3870364  | G/A | A | G |
|             | 79 | <i>RPS6KA2</i>   | 24  | rs9356531  | G/A | G | A |
|             | 80 | <i>SCD5</i>      | 49  | rs2125171  | T/C | C | G |
|             | 81 | <i>SEMA4G</i>    | 20  | rs752974   | T/C | T | G |
|             | 82 | <i>SERPINB10</i> | 3   | rs967538   | T/G | G | T |
|             | 83 | <i>SERPINB6</i>  | 7   | rs7759176  | T/C | C | G |
|             | 84 | <i>SF1</i>       | 1   | rs563536   | T/C | C | T |
|             | 85 | <i>SLC39A8</i>   | 80  | rs151402   | G/A | A | A |
|             | 86 | <i>SNCA</i>      | 124 | rs6824979  | G/C | G | G |
|             | 87 | <i>SNHG5</i>     | 8   | rs12190637 | G/A | G | A |
|             | 88 | <i>STEAP2</i>    | 101 | rs42617    | T/A | T | T |
|             | 89 | <i>TBKBP1</i>    | 55  | rs1912483  | G/A | G | A |
|             | 90 | <i>TIMM10</i>    | 49  | rs514385   | T/C | T | C |
|             | 91 | <i>TIMM22</i>    | 3   | rs2586306  | T/A | T | A |
|             | 92 | <i>UBE3C</i>     | 8   | rs1182392  | T/C | T | G |
|             | 93 | <i>USP6</i>      | 61  | rs6502843  | G/A | A | A |
|             | 94 | <i>WBSCR27</i>   | 40  | rs13244770 | T/G | T | T |
|             | 95 | <i>WDR41</i>     | 109 | rs4704434  | G/A | A | A |
|             | 96 | <i>XRN2</i>      | 157 | rs804384   | G/A | A | G |
|             | 97 | <i>XYLT1</i>     | 7   | rs4238652  | T/C | C | C |
|             | 98 | <i>YPEL4</i>     | 44  | rs633129   | G/A | A | C |
|             | 99 | <i>ZNF544</i>    | 1   | rs260462   | G/A | A | G |
| <b>SKIN</b> |    |                  |     |            |     |   |   |
|             | 1  | <i>ACCN1</i>     | 2   | rs7207800  | A/G | G | A |
|             | 2  | <i>ACTC1</i>     | 4   | rs8039278  | T/G | G | T |
|             | 3  | <i>AGR3</i>      | 2   | rs17629719 | G/T | G | G |
|             | 4  | <i>ATP13A1</i>   | 102 | rs741706   | A/G | G | A |
|             | 5  | <i>C10ORF53</i>  | 1   | rs751595   | A/G | G | C |
|             | 6  | <i>C8ORF42</i>   | 1   | rs17665859 | C/T | T | T |
|             | 7  | <i>CACNA1H</i>   | 1   | rs2745167  | T/C | T | C |
|             | 8  | <i>CCL23</i>     | 28  | rs864104   | C/T | C | A |
|             | 9  | <i>CLLU10S</i>   | 4   | rs4760407  | T/C | T | C |
|             | 10 | <i>COPG2</i>     | 1   | rs10863    | A/G | A | G |
|             | 11 | <i>EEF1G</i>     | 1   | rs11231168 | T/C | T | C |
|             | 12 | <i>FLJ10916</i>  | 7   | rs1878809  | C/G | G | C |
|             | 13 | <i>FLJ35429</i>  | 1   | rs6457121  | G/A | A | G |
|             | 14 | <i>FLJ45964</i>  | 3   | rs6713353  | G/C | G | C |
|             | 15 | <i>FTHL7</i>     | 1   | rs7991197  | C/T | T | T |
|             | 16 | <i>GUCY1B2</i>   | 31  | rs9568497  | C/T | T | T |
|             | 17 | <i>HERC6</i>     | 7   | rs713175   | C/T | T | C |
|             | 18 | <i>LOC147650</i> | 2   | rs8102075  | A/G | A | G |

|            |    |                  |     |            |     |   |   |
|------------|----|------------------|-----|------------|-----|---|---|
|            | 19 | <i>LOC283398</i> | 1   | rs10859604 | A/G | A | A |
|            | 20 | <i>LOC643453</i> | 2   | rs4876979  | G/T | T | C |
|            | 21 | <i>LOC643747</i> | 2   | rs12301198 | G/A | A | A |
|            | 22 | <i>LOC644366</i> | 2   | rs3851781  | T/C | T | C |
|            | 23 | <i>LOC644889</i> | 3   | rs11024097 | G/A | G | C |
|            | 24 | <i>LOC645351</i> | 1   | rs7712944  | G/A | G | G |
|            | 25 | <i>LOC645797</i> | 9   | rs7481311  | A/G | G | C |
|            | 26 | <i>LOC647541</i> | 3   | rs2808788  | A/G | G | G |
|            | 27 | <i>LOC648226</i> | 11  | rs7850776  | C/T | C | C |
|            | 28 | <i>LOC652367</i> | 2   | rs860214   | C/T | T | G |
|            | 29 | <i>LOC653034</i> | 1   | rs231674   | T/C | C | C |
|            | 30 | <i>LOC653486</i> | 1   | rs3758653  | C/T | C | T |
|            | 31 | <i>LOC730684</i> | 2   | rs667470   | C/T | T | T |
|            | 32 | <i>LTBP3</i>     | 1   | rs2236684  | G/T | T | A |
|            | 33 | <i>MDGA1</i>     | 4   | rs7748388  | C/T | C | G |
|            | 34 | <i>MED4</i>      | 69  | rs9567986  | T/C | C | T |
|            | 35 | <i>MUC16</i>     | 1   | rs12459695 | C/G | G | G |
|            | 36 | <i>NOX3</i>      | 1   | rs11756851 | C/T | C | T |
|            | 37 | <i>NUPL1</i>     | 1   | rs9507399  | A/G | A | G |
|            | 38 | <i>PAX8</i>      | 5   | rs7589901  | C/T | T | A |
|            | 39 | <i>PECR</i>      | 12  | rs7570208  | C/A | C | G |
|            | 40 | <i>PKD1L2</i>    | 10  | rs9934926  | C/T | T | A |
|            | 41 | <i>SEMA4G</i>    | 18  | rs807029   | C/T | C | G |
|            | 42 | <i>SH2D4A</i>    | 7   | rs748208   | T/C | T | C |
|            | 43 | <i>SOX5</i>      | 1   | rs17468457 | C/T | T | T |
|            | 44 | <i>SPINK7</i>    | 95  | rs999741   | C/T | T | C |
|            | 45 | <i>TFG</i>       | 86  | rs9878163  | A/G | G | A |
|            | 46 | <i>TIMM10</i>    | 119 | rs7943793  | A/G | G | T |
|            | 47 | <i>TMEM25</i>    | 3   | rs573971   | G/A | A | A |
|            | 48 | <i>UNC45A</i>    | 8   | rs871078   | G/C | C | A |
|            | 49 | <i>UPK1A</i>     | 15  | rs4806197  | C/T | T | C |
|            | 50 | <i>USMG5</i>     | 27  | rs4918003  | C/G | G | T |
|            | 51 | <i>WDR41</i>     | 39  | rs7714170  | C/T | T | A |
|            | 52 | <i>WFIKKN1</i>   | 20  | rs7205409  | C/T | C | C |
|            | 53 | <i>XYLT1</i>     | 1   | rs1045885  | G/C | C | C |
|            | 54 | <i>ZNF365</i>    | 63  | rs7923561  | C/T | C | A |
|            | 55 | <i>ZNF418</i>    | 63  | rs9749429  | T/C | T | C |
|            | 56 | <i>ZNF713</i>    | 1   | rs4948003  | A/T | A | T |
| <b>FAT</b> |    |                  |     |            |     |   |   |
|            | 1  | <i>ADH4</i>      | 30  | rs7694844  | A/C | A | T |
|            | 2  | <i>AGTPBP1</i>   | 33  | rs918941   | C/T | T | G |
|            | 3  | <i>ATP13A1</i>   | 98  | rs968525   | A/T | T | C |
|            | 4  | <i>B4GALT4</i>   | 4   | rs4449310  | A/G | A | C |
|            | 5  | <i>BRWD2</i>     | 45  | rs9325569  | A/T | T | G |
|            | 6  | <i>CCL23</i>     | 13  | rs864104   | A/G | G | A |
|            | 7  | <i>CDK6</i>      | 3   | rs982692   | C/G | C | T |
|            | 8  | <i>CHST13</i>    | 5   | rs6786437  | C/A | C | C |
|            | 9  | <i>CLEC12A</i>   | 5   | rs7313235  | T/C | C | C |
|            | 10 | <i>CLUAP1</i>    | 2   | rs6501178  | A/C | A | A |
|            | 11 | <i>COG6</i>      | 1   | rs2180960  | T/G | G | G |
|            | 12 | <i>COPG2</i>     | 34  | rs992859   | A/G | A | C |
|            | 13 | <i>DAPL1</i>     | 2   | rs759033   | C/G | C | T |
|            | 14 | <i>DLG4</i>      | 4   | rs8067250  | C/G | G | C |
|            | 15 | <i>DMKN</i>      | 2   | rs6510492  | A/G | G | T |
|            | 16 | <i>DPYSL4</i>    | 23  | rs902627   | G/T | G | G |
|            | 17 | <i>DSEL</i>      | 8   | rs9946666  | C/T | T | T |
|            | 18 | <i>EIF3H</i>     | 1   | rs1695714  | G/T | T | A |
|            | 19 | <i>EMR2</i>      | 18  | rs8107048  | A/G | A | C |
|            | 20 | <i>FGA</i>       | 1   | rs1316990  | C/T | T | C |
|            | 21 | <i>FLJ10916</i>  | 7   | rs7425197  | C/G | G | C |
|            | 22 | <i>FTHL7</i>     | 1   | rs3945859  | G/T | G | T |
|            | 23 | <i>FUT4</i>      | 6   | rs596855   | A/G | G | C |



|    |                  |     |            |     |   |   |
|----|------------------|-----|------------|-----|---|---|
| 24 | <i>GUCA1C</i>    | 1   | rs9821923  | C/A | C | A |
| 25 | <i>HLA-DPB1</i>  | 29  | rs9469485  | T/G | T | C |
| 26 | <i>HLA-DRB1</i>  | 54  | rs9275141  | A/C | A | G |
| 27 | <i>HMHB1</i>     | 2   | rs17100749 | C/G | G | G |
| 28 | <i>IKZF1</i>     | 4   | rs6952409  | A/G | G | G |
| 29 | <i>IL1RN</i>     | 2   | rs315948   | T/C | T | G |
| 30 | <i>IL8</i>       | 18  | rs552582   | T/G | T | A |
| 31 | <i>IPO8</i>      | 21  | rs9300199  | C/T | T | T |
| 32 | <i>IRF5</i>      | 41  | rs7808907  | A/G | G | C |
| 33 | <i>ITGA4</i>     | 1   | rs13429032 | A/G | G | G |
| 34 | <i>KCTD10</i>    | 42  | rs9593     | C/T | ? | A |
| 35 | <i>KCTD12</i>    | 2   | rs9600792  | A/G | G | T |
| 36 | <i>KCTD8</i>     | 7   | rs7684615  | G/C | C | G |
| 37 | <i>LAIR2</i>     | 1   | rs4806747  | A/G | A | A |
| 38 | <i>LDHC</i>      | 65  | rs7946331  | C/G | G | G |
| 39 | <i>LEMD3</i>     | 65  | rs990609   | A/C | A | C |
| 40 | <i>LILRA2</i>    | 3   | rs1671176  | A/C | C | C |
| 41 | <i>LOC644366</i> | 3   | rs3851781  | C/T | C | C |
| 42 | <i>LOC644889</i> | 2   | rs1544506  | T/C | T | C |
| 43 | <i>LOC645460</i> | 1   | rs17762258 | G/A | G | A |
| 44 | <i>LOC646625</i> | 7   | rs9554219  | G/T | T | T |
| 45 | <i>LOC653034</i> | 1   | rs7225168  | G/T | T | G |
| 46 | <i>LRRC25</i>    | 6   | rs8101804  | G/A | A | C |
| 47 | <i>LZTS1</i>     | 1   | rs13264395 | G/C | G | C |
| 48 | <i>MAPK7</i>     | 3   | rs9911451  | A/T | A | A |
| 49 | <i>MARCH8</i>    | 81  | rs984955   | C/T | T | A |
| 50 | <i>MED4</i>      | 101 | rs9595825  | C/T | T | T |
| 51 | <i>MEGF9</i>     | 50  | rs991121   | C/T | T | G |
| 52 | <i>MFF</i>       | 14  | rs9646881  | A/C | C | G |
| 53 | <i>MGC12965</i>  | 5   | rs682229   | T/C | C | A |
| 54 | <i>MOCOS</i>     | 2   | rs604271   | G/A | G | A |
| 55 | <i>MYH1</i>      | 50  | rs995362   | T/C | T | G |
| 56 | <i>NUDT2</i>     | 15  | rs4480190  | C/G | C | C |
| 57 | <i>PAX8</i>      | 14  | rs895417   | T/C | T | A |
| 58 | <i>PLIN</i>      | 1   | rs16942690 | G/A | G | A |
| 59 | <i>PMP2</i>      | 1   | rs13261227 | A/G | G | C |
| 60 | <i>PPIL3</i>     | 5   | rs7582581  | A/G | G | T |
| 61 | <i>PRPF31</i>    | 11  | rs42318    | G/A | A | G |
| 62 | <i>PTCHD3</i>    | 39  | rs7342136  | A/G | A | T |
| 63 | <i>PTER</i>      | 2   | rs2298126  | A/C | C | A |
| 64 | <i>RAB37</i>     | 2   | rs3850121  | T/C | C | G |
| 65 | <i>RIMS2</i>     | 37  | rs4734094  | T/A | A | G |
| 66 | <i>RNF126P1</i>  | 14  | rs9303389  | G/C | G | G |
| 67 | <i>RPL14</i>     | 127 | rs9968170  | T/C | C | T |
| 68 | <i>SEMA4G</i>    | 30  | rs807029   | C/T | C | G |
| 69 | <i>SFTPD</i>     | 52  | rs9421727  | C/T | C | T |
| 70 | <i>SILV</i>      | 4   | rs3213122  | A/G | A | C |
| 71 | <i>SLC39A8</i>   | 51  | rs9705     | A/G | G | G |
| 72 | <i>STMN2</i>     | 15  | rs4305892  | A/G | A | T |
| 73 | <i>TFG</i>       | 109 | rs989795   | A/G | G | T |
| 74 | <i>TIMM10</i>    | 162 | rs929934   | A/G | G | G |
| 75 | <i>TRPC4AP</i>   | 17  | rs6120827  | T/G | T | T |
| 76 | <i>USMG5</i>     | 26  | rs7913461  | C/G | C | A |
| 77 | <i>WBSCR27</i>   | 31  | rs8629     | G/C | C | C |
| 78 | <i>WDR41</i>     | 5   | rs335655   | C/A | C | G |
| 79 | <i>ZNF232</i>    | 87  | rs9912506  | A/G | A | G |

**Table S2 (A) P-values of Kolmogorov-Smirnov (K-S) test of pairwise comparison between groups in the RMD distribution and basic descriptive statistics for the RMD values.** Upper diagonal P-values are from randomly selected non-evQTL genes. Results obtained from the Box-Cox normalized and not normalized data are given. **(B) The per-probe statistics of RMD values for larger variance groups (MZ-L and DZ-L).** Probes with no SNP in either groups are not shown.

| <b>A Log2-transformed data</b>                  |          |          |          |          |
|-------------------------------------------------|----------|----------|----------|----------|
|                                                 | MZ-S     | DZ-S     | MZ-L     | DZ-L     |
| MZ-S                                            | -        | 0.40     | 0.031    | 2.94e-04 |
| DZ-S                                            | 9.34e-06 | -        | 0.033    | 0.026    |
| MZ-L                                            | 8.82e-18 | 1.66e-06 | -        | 0.16     |
| DZ-L                                            | 1.40e-78 | 1.66e-52 | 7.28e-22 | -        |
| <b>Box-Cox normalized log2-transformed data</b> |          |          |          |          |
|                                                 | MZ-S     | DZ-S     | MZ-L     | DZ-L     |
| MZ-S                                            | -        | 0.1670   | 4.49e-08 | 1.98e-14 |
| DZ-S                                            | 0.0486   | -        | 9.60e-11 | 8.30e-20 |
| MZ-L                                            | 1.59e-68 | 1.57e-80 | -        | 0.0333   |
| DZ-L                                            | 2.97e-85 | 1.69e-99 | 1.84e-07 | -        |

| <b>B</b>     | Probe | RMD in MZ-L and DZ-L groups |        |        |           |        |        |
|--------------|-------|-----------------------------|--------|--------|-----------|--------|--------|
|              |       | MZ-L                        |        |        | DZ-L      |        |        |
|              |       | # of SNPs                   | Mean   | Median | # of SNPs | Mean   | Median |
| ILMN_1658247 | 37    | 0.0126                      | 0.0103 | 47     | 0.0366    | 0.0150 |        |
| ILMN_1660086 | 75    | 0.0127                      | 0.0091 | 84     | 0.0180    | 0.0123 |        |
| ILMN_1664641 | 6     | 0.0062                      | 0.0060 | 31     | 0.0131    | 0.0106 |        |
| ILMN_1667229 | 24    | 0.0138                      | 0.0098 | 25     | 0.0212    | 0.0129 |        |
| ILMN_1669032 | 62    | 0.0142                      | 0.0098 | 44     | 0.0178    | 0.0175 |        |
| ILMN_1670841 | 6     | 0.0048                      | 0.0047 | 3      | 0.0135    | 0.0180 |        |
| ILMN_1675616 | 36    | 0.0102                      | 0.0094 | 39     | 0.0111    | 0.0101 |        |
| ILMN_1676528 | 41    | 0.0127                      | 0.0083 | 45     | 0.0332    | 0.0181 |        |
| ILMN_1676575 | 29    | 0.0118                      | 0.0108 | 35     | 0.0255    | 0.0167 |        |
| ILMN_1677124 | 31    | 0.0079                      | 0.0042 | 29     | 0.0141    | 0.0144 |        |
| ILMN_1678974 | 50    | 0.0115                      | 0.0085 | 28     | 0.0175    | 0.0148 |        |
| ILMN_1682034 | 124   | 0.0100                      | 0.0083 | 178    | 0.0112    | 0.0086 |        |
| ILMN_1696537 | 16    | 0.0139                      | 0.0101 | 5      | 0.0090    | 0.0047 |        |
| ILMN_1701933 | 27    | 0.0204                      | 0.0176 | 31     | 0.0325    | 0.0238 |        |
| ILMN_1704598 | 4     | 0.0114                      | 0.0119 | 2      | 0.0145    | 0.0145 |        |
| ILMN_1706959 | 32    | 0.0068                      | 0.0051 | 35     | 0.0115    | 0.0083 |        |
| ILMN_1707137 | 9     | 0.0128                      | 0.0089 | 7      | 0.0251    | 0.0083 |        |
| ILMN_1709173 | 6     | 0.0093                      | 0.0090 | 2      | 0.0041    | 0.0041 |        |
| ILMN_1709590 | 19    | 0.0172                      | 0.0114 | 6      | 0.0126    | 0.0114 |        |
| ILMN_1712400 | 7     | 0.0101                      | 0.0084 | 10     | 0.0261    | 0.0237 |        |
| ILMN_1713803 | 9     | 0.0109                      | 0.0129 | 7      | 0.0205    | 0.0090 |        |
| ILMN_1715169 | 20    | 0.0214                      | 0.0162 | 11     | 0.0323    | 0.0264 |        |
| ILMN_1715693 | 75    | 0.0112                      | 0.0090 | 69     | 0.0173    | 0.0130 |        |
| ILMN_1716218 | 11    | 0.0119                      | 0.0125 | 9      | 0.0148    | 0.0071 |        |
| ILMN_1718932 | 111   | 0.0148                      | 0.0106 | 143    | 0.0277    | 0.0151 |        |
| ILMN_1719170 | 31    | 0.0087                      | 0.0075 | 28     | 0.0149    | 0.0115 |        |
| ILMN_1719204 | 50    | 0.0067                      | 0.0064 | 53     | 0.0130    | 0.0075 |        |
| ILMN_1721727 | 29    | 0.0117                      | 0.0079 | 21     | 0.0233    | 0.0131 |        |
| ILMN_1723984 | 41    | 0.0109                      | 0.0093 | 43     | 0.0095    | 0.0076 |        |
| ILMN_1724480 | 47    | 0.0108                      | 0.0083 | 35     | 0.0206    | 0.0171 |        |
| ILMN_1726624 | 11    | 0.0088                      | 0.0101 | 8      | 0.0175    | 0.0116 |        |
| ILMN_1743836 | 2     | 0.0077                      | 0.0077 | 20     | 0.0089    | 0.0087 |        |
| ILMN_1745043 | 11    | 0.0064                      | 0.0040 | 8      | 0.0120    | 0.0112 |        |
| ILMN_1749070 | 12    | 0.0082                      | 0.0081 | 9      | 0.0129    | 0.0111 |        |
| ILMN_1751559 | 14    | 0.0124                      | 0.0087 | 11     | 0.0096    | 0.0066 |        |
| ILMN_1752150 | 7     | 0.0176                      | 0.0155 | 7      | 0.0120    | 0.0116 |        |
| ILMN_1753164 | 49    | 0.0079                      | 0.0062 | 46     | 0.0260    | 0.0085 |        |
| ILMN_1753312 | 26    | 0.0151                      | 0.0118 | 29     | 0.0145    | 0.0117 |        |

|              |     |        |        |     |        |        |
|--------------|-----|--------|--------|-----|--------|--------|
| ILMN_1756579 | 41  | 0.0079 | 0.0055 | 33  | 0.0090 | 0.0065 |
| ILMN_1764754 | 35  | 0.0096 | 0.0070 | 27  | 0.0179 | 0.0128 |
| ILMN_1765274 | 24  | 0.0114 | 0.0085 | 17  | 0.0150 | 0.0103 |
| ILMN_1765332 | 38  | 0.0088 | 0.0067 | 42  | 0.0199 | 0.0171 |
| ILMN_1766165 | 27  | 0.0118 | 0.0077 | 31  | 0.0141 | 0.0119 |
| ILMN_1778347 | 21  | 0.0084 | 0.0088 | 10  | 0.0132 | 0.0089 |
| ILMN_1778488 | 14  | 0.0069 | 0.0070 | 14  | 0.0141 | 0.0052 |
| ILMN_1780601 | 8   | 0.0166 | 0.0132 | 7   | 0.0133 | 0.0117 |
| ILMN_1781388 | 19  | 0.0155 | 0.0119 | 6   | 0.0212 | 0.0121 |
| ILMN_1784294 | 32  | 0.0149 | 0.0111 | 31  | 0.0218 | 0.0195 |
| ILMN_1787199 | 62  | 0.0077 | 0.0059 | 53  | 0.0083 | 0.0065 |
| ILMN_1795336 | 52  | 0.0080 | 0.0045 | 54  | 0.0209 | 0.0107 |
| ILMN_1809496 | 27  | 0.0108 | 0.0099 | 17  | 0.0153 | 0.0098 |
| ILMN_1813746 | 18  | 0.0173 | 0.0118 | 13  | 0.0237 | 0.0177 |
| ILMN_1835359 | 9   | 0.0125 | 0.0104 | 3   | 0.0232 | 0.0180 |
| ILMN_1836218 | 29  | 0.0090 | 0.0080 | 31  | 0.0147 | 0.0088 |
| ILMN_1851610 | 2   | 0.0029 | 0.0029 | 22  | 0.0079 | 0.0056 |
| ILMN_1854132 | 13  | 0.0102 | 0.0081 | 10  | 0.0077 | 0.0055 |
| ILMN_1864228 | 1   | 0.0141 | 0.0141 | 11  | 0.0123 | 0.0064 |
| ILMN_1885273 | 14  | 0.0124 | 0.0095 | 6   | 0.0116 | 0.0088 |
| ILMN_1897741 | 12  | 0.0090 | 0.0075 | 8   | 0.0296 | 0.0290 |
| ILMN_1900622 | 1   | 0.0047 | 0.0047 | 1   | 0.0024 | 0.0024 |
| ILMN_1900994 | 10  | 0.0062 | 0.0033 | 5   | 0.0086 | 0.0075 |
| ILMN_1904238 | 53  | 0.0120 | 0.0091 | 46  | 0.0192 | 0.0141 |
| ILMN_2086222 | 61  | 0.0140 | 0.0116 | 61  | 0.0119 | 0.0090 |
| ILMN_2120982 | 4   | 0.0167 | 0.0157 | 7   | 0.0111 | 0.0080 |
| ILMN_2134224 | 15  | 0.0086 | 0.0086 | 7   | 0.0067 | 0.0039 |
| ILMN_2147424 | 21  | 0.0124 | 0.0101 | 24  | 0.0239 | 0.0187 |
| ILMN_2154287 | 3   | 0.0294 | 0.0370 | 1   | 0.0061 | 0.0061 |
| ILMN_2173294 | 45  | 0.0062 | 0.0049 | 28  | 0.0147 | 0.0095 |
| ILMN_2181363 | 20  | 0.0141 | 0.0106 | 12  | 0.0074 | 0.0034 |
| ILMN_2183938 | 20  | 0.0220 | 0.0172 | 11  | 0.0441 | 0.0346 |
| ILMN_2196479 | 14  | 0.0129 | 0.0090 | 13  | 0.0197 | 0.0128 |
| ILMN_2198408 | 15  | 0.0196 | 0.0148 | 11  | 0.0237 | 0.0209 |
| ILMN_2200659 | 109 | 0.0069 | 0.0058 | 131 | 0.0146 | 0.0091 |
| ILMN_2223922 | 4   | 0.0104 | 0.0116 | 1   | 0.0088 | 0.0088 |
| ILMN_2233539 | 55  | 0.0192 | 0.0135 | 58  | 0.0266 | 0.0151 |
| ILMN_2237428 | 10  | 0.0134 | 0.0115 | 5   | 0.0129 | 0.0075 |
| ILMN_2246083 | 53  | 0.0247 | 0.0188 | 40  | 0.0299 | 0.0257 |
| ILMN_2262288 | 91  | 0.0079 | 0.0046 | 113 | 0.0153 | 0.0096 |

**Table S3 LCL evQTLs and interacting SNPs. P-value indicates the linear regression significance between interacting SNP genotype and gene expression of evQTL gene (see Methods). Two genes close to interacting SNPs at *trans*-genomic location are given.**

| LCL evQTL gene   | evSNP      | evSNP position  | Interacting SNP | Interacting SNP position | P-value  | <i>trans</i> -located gene |
|------------------|------------|-----------------|-----------------|--------------------------|----------|----------------------------|
| <i>PTER</i>      | rs7913889  | chr10:16559381  | rs7909832       | chr10:16556710           | 8.66E-77 |                            |
| <i>ERAP2</i>     | rs6880490  | chr5:96185549   | rs11135484      | chr5:96221889            | 4.76E-45 |                            |
| <i>BBS2</i>      | rs14306    | chr16:56510299  | rs13337155      | chr16:56504724           | 5.77E-39 |                            |
| <i>IPO8</i>      | rs1371053  | chr12:30845705  | rs7968343       | chr12:30817004           | 6.16E-38 |                            |
| <i>WDR41</i>     | rs4704434  | chr5:76890568   | rs441102        | chr5:76738970            | 4.31E-33 |                            |
| <i>SEMA4G</i>    | rs752974   | chr10:102762256 | rs12571302      | chr10:102742763          | 4.13E-32 |                            |
| <i>N4BP2</i>     | rs6824761  | chr4:40054818   | rs4974962       | chr4:40115239            | 4.92E-29 |                            |
| <i>PPIL3</i>     | rs3731714  | chr2:202060820  | rs7606251       | chr2:201736734           | 7.47E-28 |                            |
| <i>PILRB</i>     | rs5015756  | chr7:100013457  | rs7341507       | chr7:99951315            | 9.06E-27 |                            |
| <i>TIMM10</i>    | rs514385   | chr11:57306011  | rs3851118       | chr11:57280951           | 1.36E-23 |                            |
| <i>LOC440160</i> | rs12052294 | chr2:132433268  | rs6720375       | chr2:132440073           | 1.15E-21 |                            |
| <i>C12ORF28</i>  | rs775439   | chr12:70096374  | rs811822        | chr12:70107646           | 1.35E-20 |                            |
| <i>TIMM22</i>    | rs2586306  | chr17:909451    | rs2241931       | chr17:909653             | 2.05E-20 |                            |
| <i>SERPINB10</i> | rs967538   | chr18:61509075  | rs6567399       | chr18:61544546           | 1.60E-19 |                            |
| <i>BTN3A2</i>    | rs742090   | chr6:26415637   | rs3799378       | chr6:26404374            | 4.29E-19 |                            |
| <i>SCD5</i>      | rs2125171  | chr4:83835698   | rs6830527       | chr4:83798446            | 7.00E-18 |                            |
| <i>GOLPH4</i>    | rs13100726 | chr3:167707035  | rs9873288       | chr3:167726096           | 2.77E-17 |                            |
| <i>NUDT2</i>     | rs1337593  | chr9:34334015   | rs7032924       | chr9:34167694            | 2.59E-16 |                            |
| <i>LOC642290</i> | rs7255207  | chr19:28385923  | rs7258333       | chr19:28269920           | 8.94E-16 |                            |
| <i>NMNAT3</i>    | rs4367021  | chr3:139420218  | rs9822952       | chr3:139385257           | 1.44E-15 |                            |
| <i>IRF5</i>      | rs10156169 | chr7:128684571  | rs8043          | chr7:128607384           | 9.33E-15 |                            |
| <i>IKZF1</i>     | rs7789635  | chr7:50473610   | rs10216316      | chr7:50462418            | 5.65E-14 |                            |
| <i>C12ORF54</i>  | rs2731094  | chr12:48881661  | rs12318285      | chr12:48905575           | 8.20E-14 |                            |
| <i>LEMDD3</i>    | rs11175680 | chr12:65605539  | rs2133323       | chr12:65577453           | 1.16E-13 |                            |
| <i>MTRR</i>      | rs327588   | chr5:7908359    | rs1801394       | chr5:7870973             | 1.40E-12 |                            |
| <i>WBSCR27</i>   | rs13244770 | chr7:73280691   | rs4440516       | chr7:73224041            | 3.61E-12 |                            |
| <i>XYLT1</i>     | rs4238652  | chr16:17199665  | rs7190386       | chr16:17183373           | 4.25E-12 |                            |
| <i>ITIH4</i>     | rs2240915  | chr3:52859526   | rs17331178      | chr3:52847544            | 5.13E-12 |                            |
| <i>ATP13A1</i>   | rs4808964  | chr19:19603692  | rs2304128       | chr19:19746151           | 1.18E-11 |                            |
| <i>KLHDC4</i>    | rs2012475  | chr16:87760814  | rs2290019       | chr16:87741662           | 2.95E-11 |                            |
| <i>HCLS1</i>     | rs4472078  | chr3:121477634  | rs12493927      | chr3:121378927           | 7.57E-11 |                            |
| <i>MTERFD2</i>   | rs3815291  | chr2:242032540  | rs7559967       | chr2:242006736           | 8.75E-10 |                            |
| <i>HCG22</i>     | rs1064191  | chr6:31075375   | rs2523857       | chr6:31021504            | 2.12E-09 |                            |
| <i>LOC650557</i> | rs1980495  | chr6:32346794   | rs3129878       | chr6:32408735            | 3.03E-09 |                            |
| <i>CDCP1</i>     | rs6441894  | chr3:45206579   | rs7633169       | chr3:45185519            | 1.21E-08 |                            |
| <i>HLA-DPB1</i>  | rs9277341  | chr6:33039625   | rs9501259       | chr6:33055551            | 1.15E-07 |                            |
| <i>LDHC</i>      | rs3993291  | chr11:18479739  | rs4757662       | chr11:18439738           | 1.19E-07 |                            |
| <i>AXIN2</i>     | rs740026   | chr17:63561681  | rs757558        | chr17:63561592           | 1.25E-07 |                            |
| <i>FLJ10916</i>  | rs4246598  | chr2:88438050   | rs2970924       | chr2:88433305            | 2.24E-07 |                            |
| <i>MED4</i>      | rs9534912  | chr13:48588564  | rs9526455       | chr13:48712474           | 2.62E-07 |                            |
| <i>RPS6KA2</i>   | rs9356531  | chr6:167276965  | rs9355601       | chr6:167269159           | 3.29E-07 |                            |
| <i>C16ORF30</i>  | rs2076441  | chr16:1590576   | rs2235643       | chr16:1585115            | 1.76E-06 |                            |
| <i>PLXDC2</i>    | rs2038912  | chr10:20207349  | rs1326233       | chr10:20238864           | 2.64E-06 |                            |
| <i>UBE3C</i>     | rs1182392  | chr7:157036200  | rs10271990      | chr7:157037521           | 3.76E-06 |                            |
| <i>SERPINB6</i>  | rs7759176  | chr6:2915664    | rs7751676       | chr6:2931879             | 6.59E-06 |                            |
| <i>COPG2</i>     | rs12706942 | chr7:130149061  | rs10128         | chr7:130151694           | 7.90E-06 |                            |
| <i>EIF5A</i>     | rs7220464  | chr17:7210836   | rs11078672      | chr17:7215142            | 9.29E-06 |                            |
| <i>ALG11</i>     | rs9526819  | chr13:52563475  | rs3742289       | chr13:52603194           | 2.63E-05 |                            |
| <i>SLC39A8</i>   | rs151402   | chr4:103190486  | rs151372        | chr4:103174196           | 2.65E-05 |                            |
| <i>HMMH1</i>     | rs17100739 | chr5:143112574  | rs10498677      | chr6:11466011            | 3.20E-05 | <i>TMEM170B</i>            |
| <i>COX4NB</i>    | rs301164   | chr16:85813880  | rs9923691       | chr16:85824190           | 6.63E-05 |                            |
| <i>CPNE1</i>     | rs224354   | chr20:34054609  | rs1118233       | chr20:34228349           | 7.84E-05 |                            |
| <i>YPEL4</i>     | rs633129   | chr11:57685196  | rs12790660      | chr11:57667222           | 9.68E-05 |                            |
| <i>PRPF31</i>    | rs254259   | chr19:54606405  | rs16985368      | chr19:54614590           | 1.17E-04 |                            |
| <i>C7ORF28B</i>  | rs10242703 | chr7:6870635    | rs2792574       | chr14:48676427           | 2.86E-04 | <i>MDGA2</i>               |
| <i>CPA4</i>      | rs6953940  | chr7:129947007  | rs3807344       | chr7:129934219           | 4.33E-04 |                            |



|            |                 |                                                                                                                                                                                                                                                                                                                                                                                                                                                                                                                                                                                                                                                                                                                                                                                                                                                            |                                                                                                                                                                                                                                                                                                                                                                                                                                                      |
|------------|-----------------|------------------------------------------------------------------------------------------------------------------------------------------------------------------------------------------------------------------------------------------------------------------------------------------------------------------------------------------------------------------------------------------------------------------------------------------------------------------------------------------------------------------------------------------------------------------------------------------------------------------------------------------------------------------------------------------------------------------------------------------------------------------------------------------------------------------------------------------------------------|------------------------------------------------------------------------------------------------------------------------------------------------------------------------------------------------------------------------------------------------------------------------------------------------------------------------------------------------------------------------------------------------------------------------------------------------------|
|            |                 | arthritis Systemic lupus erythematosus Multiple sclerosis Multiple sclerosis Ulcerative colitis Multiple sclerosis Rheumatoid arthritis Arthritis (juvenile idiopathic) Rheumatoid arthritis Type 1 diabetes Rheumatoid arthritis Response to ximelagatran treatment                                                                                                                                                                                                                                                                                                                                                                                                                                                                                                                                                                                       |                                                                                                                                                                                                                                                                                                                                                                                                                                                      |
|            | <i>ITIH4</i>    | Ulcerative colitis Immune reponse to smallpox (secreted IL-2) Schizophrenia Bipolar disorder                                                                                                                                                                                                                                                                                                                                                                                                                                                                                                                                                                                                                                                                                                                                                               | rs9847710-C rs17331151-A rs2239547-? rs736408-C                                                                                                                                                                                                                                                                                                                                                                                                      |
| <b>FAT</b> |                 |                                                                                                                                                                                                                                                                                                                                                                                                                                                                                                                                                                                                                                                                                                                                                                                                                                                            |                                                                                                                                                                                                                                                                                                                                                                                                                                                      |
|            | <i>CDK6</i>     | White blood cell types White blood cell count Height Height Rheumatoid arthritis Height Height Height                                                                                                                                                                                                                                                                                                                                                                                                                                                                                                                                                                                                                                                                                                                                                      | rs445-C rs445-T rs42235-T rs2282978-? rs42041-G rs2282978-C rs2040494-C rs2282978-C                                                                                                                                                                                                                                                                                                                                                                  |
|            | <i>FGA</i>      | Venous thromboembolism Fibrinogen D-dimer levels Fibrinogen                                                                                                                                                                                                                                                                                                                                                                                                                                                                                                                                                                                                                                                                                                                                                                                                | rs7659024-A rs6050-C rs13109457-A rs6056-A                                                                                                                                                                                                                                                                                                                                                                                                           |
|            | <i>IRF5</i>     | Systemic lupus erythematosus Ulcerative colitis Systemic lupus erythematosus Systemic sclerosis Systemic sclerosis Systemic sclerosis Systemic sclerosis Systemic sclerosis Primary biliary cirrhosis Systemic lupus erythematosus Systemic lupus erythematosus Ulcerative colitis Primary biliary cirrhosis Rheumatoid arthritis Systemic sclerosis Systemic lupus erythematosus Systemic lupus erythematosus Systemic lupus erythematosus                                                                                                                                                                                                                                                                                                                                                                                                                | rs729302-A rs4728142-A rs729302-A rs10488631-? rs10488631-? rs10488631-? rs10488631-? rs10488631-C rs12531711-G rs12531711-G rs10488631-C rs4728142-A rs10488631-C rs10488631-C rs10488631-C rs4728142-A rs12537284-A rs10488631-C                                                                                                                                                                                                                   |
|            | <i>IKZF1</i>    | Systemic lupus erythematosus Red blood cell traits Inflammatory bowel disease Crohn's disease Systemic lupus erythematosus Mean corpuscular volume Acute lymphoblastic leukemia (childhood) Acute lymphoblastic leukemia (childhood) Hippocampal atrophy                                                                                                                                                                                                                                                                                                                                                                                                                                                                                                                                                                                                   | rs10276619-G rs12718598-T rs1456896-T rs1456896-T rs4917014-A rs12718597-A rs4132601-C rs11978267-G rs10276619-?                                                                                                                                                                                                                                                                                                                                     |
|            | <i>MEGF9</i>    | Response to statin therapy                                                                                                                                                                                                                                                                                                                                                                                                                                                                                                                                                                                                                                                                                                                                                                                                                                 | rs16909449-C                                                                                                                                                                                                                                                                                                                                                                                                                                         |
|            | <i>FUT4</i>     | Response to angiotensin II receptor blocker therapy Response to angiotensin II receptor blocker therapy (opposite direction w/ diuretic therapy)                                                                                                                                                                                                                                                                                                                                                                                                                                                                                                                                                                                                                                                                                                           | rs11020821-C rs11020821-C                                                                                                                                                                                                                                                                                                                                                                                                                            |
|            | <i>KCTD8</i>    | Response to amphetamines Anticoagulant levels                                                                                                                                                                                                                                                                                                                                                                                                                                                                                                                                                                                                                                                                                                                                                                                                              | rs17641529-? rs13130255-?                                                                                                                                                                                                                                                                                                                                                                                                                            |
|            | <i>PAX8</i>     | Renal function-related traits (BUN)                                                                                                                                                                                                                                                                                                                                                                                                                                                                                                                                                                                                                                                                                                                                                                                                                        | <b>rs11123170-G</b>                                                                                                                                                                                                                                                                                                                                                                                                                                  |
|            | <i>COG6</i>     | Psoriasis                                                                                                                                                                                                                                                                                                                                                                                                                                                                                                                                                                                                                                                                                                                                                                                                                                                  | rs7993214-?                                                                                                                                                                                                                                                                                                                                                                                                                                          |
|            | <i>TRPC4AP</i>  | Prothrombin time                                                                                                                                                                                                                                                                                                                                                                                                                                                                                                                                                                                                                                                                                                                                                                                                                                           | rs2295888-A                                                                                                                                                                                                                                                                                                                                                                                                                                          |
|            | <i>BRWD2</i>    | Obesity-related traits Visceral fat                                                                                                                                                                                                                                                                                                                                                                                                                                                                                                                                                                                                                                                                                                                                                                                                                        | rs2919009-A rs7085142-T                                                                                                                                                                                                                                                                                                                                                                                                                              |
|            | <i>IL1RN</i>    | Obesity-related traits C-reactive protein Protein quantitative trait loci                                                                                                                                                                                                                                                                                                                                                                                                                                                                                                                                                                                                                                                                                                                                                                                  | rs4252023-A rs6734238-G rs6761276-?                                                                                                                                                                                                                                                                                                                                                                                                                  |
|            | <i>DAPL1</i>    | Obesity-related traits                                                                                                                                                                                                                                                                                                                                                                                                                                                                                                                                                                                                                                                                                                                                                                                                                                     | rs16843372-G                                                                                                                                                                                                                                                                                                                                                                                                                                         |
|            | <i>PTER</i>     | Obesity                                                                                                                                                                                                                                                                                                                                                                                                                                                                                                                                                                                                                                                                                                                                                                                                                                                    | rs10508503-C                                                                                                                                                                                                                                                                                                                                                                                                                                         |
|            | <i>ITGA4</i>    | Monocyte count White blood cell types Celiac disease                                                                                                                                                                                                                                                                                                                                                                                                                                                                                                                                                                                                                                                                                                                                                                                                       | rs2124440-G rs12988934-T rs13010713-G                                                                                                                                                                                                                                                                                                                                                                                                                |
|            | <i>DSEL</i>     | Major depressive disorder Cognitive performance                                                                                                                                                                                                                                                                                                                                                                                                                                                                                                                                                                                                                                                                                                                                                                                                            | rs17077540-G rs2124349-?                                                                                                                                                                                                                                                                                                                                                                                                                             |
|            | <i>HLA-DRB1</i> | Lymphoma Epstein-Barr virus immune response (EBNA-1) Leishmaniasis (visceral) Systemic lupus erythematosus Crohn's disease Schizophrenia Ulcerative colitis Hepatocellular carcinoma Immune response to anthrax vaccine  Hypothyroidism IgA nephropathy Multiple sclerosis Nodular sclerosis Hodgkin lymphoma Nodular sclerosis Hodgkin lymphoma Systemic sclerosis Response to interferon beta therapy Rheumatoid arthritis Nephropathy Ulcerative colitis Rheumatoid arthritis Immunoglobulin A  Immunoglobulin A  Lumiracoxib-related liver injury Rheumatoid arthritis Rheumatoid arthritis Systemic lupus erythematosus Multiple sclerosis Multiple sclerosis Ulcerative colitis Multiple sclerosis Rheumatoid arthritis Arthritis (juvenile idiopathic) Rheumatoid arthritis Type 1 diabetes Rheumatoid arthritis Response to ximelagatran treatment | rs9268853-C rs477515-T rs9271858-G rs9270984-T rs7765379-G rs4530903-? rs6927022-A rs9272105-A rs3104402-A rs3129720-C rs660895-G rs3129889-G 5-SNP haplotype 6 5-SNP haplotype 3 rs3129763-? rs9272105-A rs7765379-? rs9275956-? rs9268853-T rs7765379-? rs9271366-? rs2187668-A rs3129900-? rs13192471-G rs6910071-G rs9271100-? rs9271366-G rs3135388-A rs2395185-? rs3129934-T rs6457620-? rs2395148-? rs660895-? rs2647044-A rs615672-? DRB1*07 |
|            | <i>DLG4</i>     | Liver enzyme levels (alkaline phosphatase)                                                                                                                                                                                                                                                                                                                                                                                                                                                                                                                                                                                                                                                                                                                                                                                                                 | rs314253-C                                                                                                                                                                                                                                                                                                                                                                                                                                           |
|            | <i>IL8</i>      | Inflammatory bowel disease                                                                                                                                                                                                                                                                                                                                                                                                                                                                                                                                                                                                                                                                                                                                                                                                                                 | rs2472649-G                                                                                                                                                                                                                                                                                                                                                                                                                                          |
|            | <i>KCTD10</i>   | HDL cholesterol                                                                                                                                                                                                                                                                                                                                                                                                                                                                                                                                                                                                                                                                                                                                                                                                                                            | rs9943753-G                                                                                                                                                                                                                                                                                                                                                                                                                                          |
|            | <i>PTCHD3</i>   | Fasting insulin-related traits (interaction with BMI)                                                                                                                                                                                                                                                                                                                                                                                                                                                                                                                                                                                                                                                                                                                                                                                                      | rs1334893-?                                                                                                                                                                                                                                                                                                                                                                                                                                          |
|            | <i>ADH4</i>     | Esophageal cancer (alcohol interaction)                                                                                                                                                                                                                                                                                                                                                                                                                                                                                                                                                                                                                                                                                                                                                                                                                    | rs3805322-?                                                                                                                                                                                                                                                                                                                                                                                                                                          |
|            | <i>SLC39A8</i>  | Diastolic blood pressure Hypertension Systolic blood pressure Blood pressure Body mass index HDL cholesterol                                                                                                                                                                                                                                                                                                                                                                                                                                                                                                                                                                                                                                                                                                                                               | rs13107325-T rs13107325-T rs13107325-T rs13107325-T rs13107325-T rs13107325-T                                                                                                                                                                                                                                                                                                                                                                        |
|            | <i>LZTS1</i>    | Dental caries Dental caries Major depressive disorder (broad)                                                                                                                                                                                                                                                                                                                                                                                                                                                                                                                                                                                                                                                                                                                                                                                              | rs4922199-? rs10111661-? rs1106634-A                                                                                                                                                                                                                                                                                                                                                                                                                 |
|            | <i>STMN2</i>    | Creutzfeldt-Jakob disease                                                                                                                                                                                                                                                                                                                                                                                                                                                                                                                                                                                                                                                                                                                                                                                                                                  | rs1460163-A                                                                                                                                                                                                                                                                                                                                                                                                                                          |
|            | <i>EIF3H</i>    | Corneal curvature Colorectal cancer Colorectal cancer                                                                                                                                                                                                                                                                                                                                                                                                                                                                                                                                                                                                                                                                                                                                                                                                      | rs11987235-A rs16892766-? rs16892766-A                                                                                                                                                                                                                                                                                                                                                                                                               |
|            | <i>SFTPD</i>    | Chronic obstructive pulmonary disease-related biomarkers Chronic obstructive pulmonary disease-related biomarkers                                                                                                                                                                                                                                                                                                                                                                                                                                                                                                                                                                                                                                                                                                                                          | rs7078012-T rs3923564-G                                                                                                                                                                                                                                                                                                                                                                                                                              |
|            | <i>WDR41</i>    | Caudate nucleus volume                                                                                                                                                                                                                                                                                                                                                                                                                                                                                                                                                                                                                                                                                                                                                                                                                                     | <b>rs163030-A</b>                                                                                                                                                                                                                                                                                                                                                                                                                                    |
|            | <i>HLA-DPB1</i> | Aspirin exacerbated respiratory disease in asthmatics Hepatitis B (viral clearance) Hepatitis B (viral                                                                                                                                                                                                                                                                                                                                                                                                                                                                                                                                                                                                                                                                                                                                                     | rs1042151-G rs9277535-G rs9277535-G rs9277535-? rs987870-? rs9277535-                                                                                                                                                                                                                                                                                                                                                                                |

|             |               |                                                                                                                                                                           |                                                                                                                                            |
|-------------|---------------|---------------------------------------------------------------------------------------------------------------------------------------------------------------------------|--------------------------------------------------------------------------------------------------------------------------------------------|
|             |               | clearance) Hepatitis B vaccine response Systemic sclerosis Hepatitis B Nephropathy Hepatitis B                                                                            | G rs1883414-? rs9277535-G                                                                                                                  |
|             | <i>LDHC</i>   | Amyloid A Levels                                                                                                                                                          | rs2896526-G                                                                                                                                |
| <b>SKIN</b> |               |                                                                                                                                                                           |                                                                                                                                            |
|             | <i>LTBP3</i>  | Urate levels Non-alcoholic fatty liver disease histology (lobular)                                                                                                        | rs642803-T rs6591182-A                                                                                                                     |
|             | <i>PAX8</i>   | Renal function-related traits (BUN)                                                                                                                                       | <b>rs11123170-G</b>                                                                                                                        |
|             | <i>ACTC1</i>  | Prostate cancer (gene x gene interaction) Refractive error                                                                                                                | rs543686-? rs634990-C                                                                                                                      |
|             | <i>ACCN1</i>  | Obesity-related traits vWF and FVIII levels                                                                                                                               | rs17808461-A rs1354492-A                                                                                                                   |
|             | <i>SOX5</i>   | Non-obstructive azoospermia Systemic sclerosis Systemic sclerosis Response to statin therapy Response to antipsychotic treatment PR interval AIDS                         | rs10842262-? rs11047102-? rs11047102-? rs7979575-C rs1464500-? rs11047543-A rs1522232-C                                                    |
|             | <i>HERC6</i>  | Metabolite levels                                                                                                                                                         | rs1440581-?                                                                                                                                |
|             | <i>WDR41</i>  | Caudate nucleus volume                                                                                                                                                    | <b>rs163030-A</b>                                                                                                                          |
|             | <i>PKD1L2</i> | Attention deficit hyperactivity disorder and conduct disorder                                                                                                             | rs4889240-T                                                                                                                                |
|             | <i>ZNF365</i> | Atopic dermatitis Crohn's disease Breast size Crohn's disease Intelligence Ewing sarcoma Breast cancer Mammographic density Crohn's disease Breast cancer Crohn's disease | rs10995251-C rs10761659-G rs7089814-C rs7076156-G rs10995170-? rs224278-C rs10822013-T rs10995190-A rs10761659-G rs10995190-G rs10995271-C |
|             | <i>PECR</i>   | Alcohol dependence                                                                                                                                                        | rs7590720-G                                                                                                                                |
