# Supplementary material
Source: PubMed Central journal article supplement (PMC3914615)
Supplement: 11b17c5d55825253e41933df1e64d1d8_genetics.113.157503-5.pdf [file 11b17c5d55825253e41933df1e64d1d8_genetics.113.157503-5.pdf]

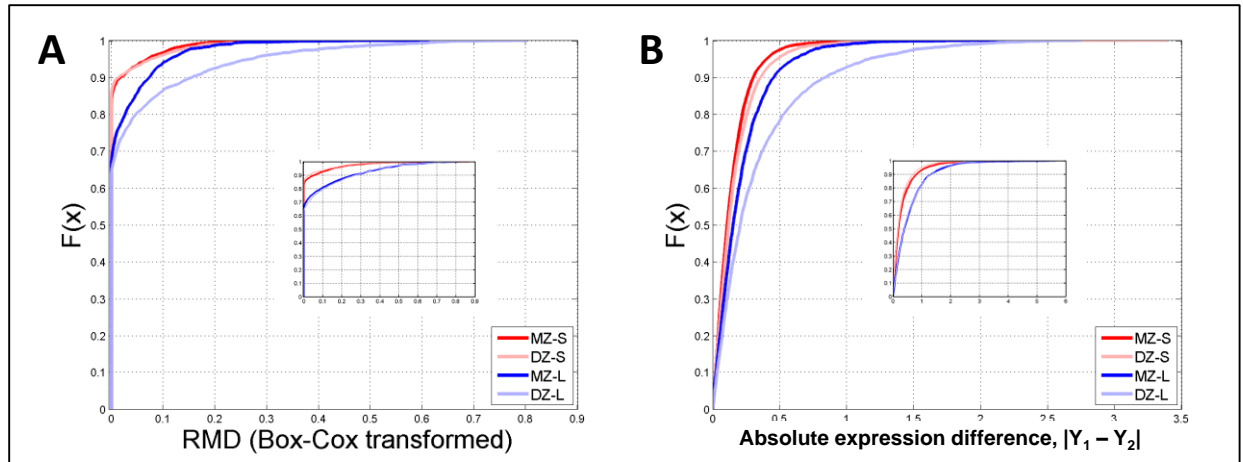

**Figure S3** Comparison between results of the CDF analysis for the expression difference between twin pairs in evQTL genes. **(A)** Results obtained using RMD of Box-Cox normalized  $\log_2$ -transformed data between twin pairs. **(B)** Results obtained using absolute difference of  $\log_2$ -transformed data between twin pairs.
