# Supplementary material
Source: PubMed Central journal article supplement (PMC3914615)
Supplement: 27a9923d582972fbda0abeb4545a3336_genetics.113.157503-7.pdf [file 27a9923d582972fbda0abeb4545a3336_genetics.113.157503-7.pdf]

**Table S1 List of evQTLs detected in LCL, skin, and fat tissues.**

| Tissue     |    | Gene             | # of <i>cis</i> -evQTL SNPs | Representative evQTL SNP | Alleles | Allele associated with larger expression variance | Ancestral allele |
|------------|----|------------------|-----------------------------|--------------------------|---------|---------------------------------------------------|------------------|
| <b>LCL</b> |    |                  |                             |                          |         |                                                   |                  |
|            | 1  | <i>AGTPBP1</i>   | 61                          | rs7847905                | T/C     | C                                                 | T                |
|            | 2  | <i>ALG11</i>     | 171                         | rs9526819                | G/A     | G                                                 | A                |
|            | 3  | <i>ATP13A1</i>   | 108                         | rs4808964                | C/A     | C                                                 | A                |
|            | 4  | <i>AXIN2</i>     | 2                           | rs740026                 | G/A     | A                                                 | G                |
|            | 5  | <i>BBS2</i>      | 41                          | rs14306                  | C/A     | A                                                 | G                |
|            | 6  | <i>BRWD2</i>     | 43                          | rs729704                 | T/C     | T                                                 | T                |
|            | 7  | <i>BTN3A2</i>    | 107                         | rs742090                 | C/A     | A                                                 | G                |
|            | 8  | <i>C12ORF28</i>  | 173                         | rs775439                 | G/A     | A                                                 | A                |
|            | 9  | <i>C12ORF54</i>  | 27                          | rs2731094                | T/C     | C                                                 | T                |
|            | 10 | <i>C16ORF30</i>  | 15                          | rs2076441                | G/C     | C                                                 | G                |
|            | 11 | <i>C17ORF97</i>  | 2                           | rs6565724                | T/C     | T                                                 | C                |
|            | 12 | <i>C7ORF28B</i>  | 3                           | rs10242703               | G/A     | A                                                 | A                |
|            | 13 | <i>CAPN11</i>    | 1                           | rs6938938                | G/A     | G                                                 | G                |
|            | 14 | <i>CDCP1</i>     | 3                           | rs6441894                | T/C     | C                                                 | T                |
|            | 15 | <i>CDO1</i>      | 21                          | rs698366                 | T/G     | T                                                 | C                |
|            | 16 | <i>CHST3</i>     | 11                          | rs4148929                | C/A     | C                                                 | C                |
|            | 17 | <i>COPG2</i>     | 38                          | rs12706942               | G/C     | C                                                 | G                |
|            | 18 | <i>CORO2A</i>    | 12                          | rs12351801               | T/C     | T                                                 | C                |
|            | 19 | <i>COX4NB</i>    | 24                          | rs301164                 | T/C     | C                                                 | C                |
|            | 20 | <i>CPA4</i>      | 74                          | rs6953940                | G/A     | A                                                 | G                |
|            | 21 | <i>CPNE1</i>     | 205                         | rs224354                 | G/C     | G                                                 | C                |
|            | 22 | <i>DDIT4L</i>    | 64                          | rs2866194                | G/A     | A                                                 | A                |
|            | 23 | <i>EEF1G</i>     | 6                           | rs1058678                | T/C     | C                                                 | A                |
|            | 24 | <i>EIF5A</i>     | 1                           | rs7220464                | T/G     | T                                                 | G                |
|            | 25 | <i>EMR1</i>      | 2                           | rs4807916                | T/C     | C                                                 | C                |
|            | 26 | <i>ERAP2</i>     | 2                           | rs6880490                | T/A     | A                                                 | T                |
|            | 27 | <i>FLJ10916</i>  | 15                          | rs4246598                | C/A     | A                                                 | C                |
|            | 28 | <i>GAD1</i>      | 1                           | rs13007861               | C/A     | C                                                 | C                |
|            | 29 | <i>GDA</i>       | 19                          | rs7019060                | G/A     | A?                                                | G                |
|            | 30 | <i>GOLPH4</i>    | 1                           | rs13100726               | G/A     | G                                                 | A                |
|            | 31 | <i>HCG22</i>     | 100                         | rs1064191                | T/C     | C                                                 | G                |
|            | 32 | <i>HCLS1</i>     | 2                           | rs4472078                | T/C     | T                                                 | G                |
|            | 33 | <i>HEY2</i>      | 36                          | rs628009                 | T/G     | G?                                                | A                |
|            | 34 | <i>HLA-DPB1</i>  | 59                          | rs9277341                | T/C     | T                                                 | C                |
|            | 35 | <i>HLA-DRB1</i>  | 27                          | rs9272723                | T/C     | C                                                 | T                |
|            | 36 | <i>HMHB1</i>     | 3                           | rs17100739               | G/A     | A                                                 | G                |
|            | 37 | <i>HYAL4</i>     | 8                           | rs12674456               | T/C     | T                                                 | T                |
|            | 38 | <i>IKZF1</i>     | 14                          | rs7789635                | T/C     | C                                                 | T                |
|            | 39 | <i>IPO8</i>      | 32                          | rs1371053                | T/C     | C                                                 | C                |
|            | 40 | <i>IRF5</i>      | 3                           | rs10156169               | G/A     | A                                                 | G                |
|            | 41 | <i>ITIH4</i>     | 26                          | rs2240915                | T/A     | T                                                 | T                |
|            | 42 | <i>KANK1</i>     | 17                          | rs2361106                | G/A     | G                                                 | A                |
|            | 43 | <i>KLHDC4</i>    | 2                           | rs2012475                | T/G     | G                                                 | T                |
|            | 44 | <i>LDHC</i>      | 19                          | rs3993291                | T/C     | T                                                 | C                |
|            | 45 | <i>LEMD3</i>     | 77                          | rs11175680               | G/C     | G                                                 | A                |
|            | 46 | <i>LOC440160</i> | 8                           | rs12052294               | G/A     | A                                                 | G                |
|            | 47 | <i>LOC642290</i> | 1                           | rs7255207                | T/C     | T                                                 | C                |
|            | 48 | <i>LOC648453</i> | 3                           | rs17753176               | T/A     | A                                                 | A                |
|            | 49 | <i>LOC650263</i> | 44                          | rs726920                 | G/C     | G                                                 | G                |
|            | 50 | <i>LOC650557</i> | 445                         | rs1980495                | C/A     | C                                                 | G                |
|            | 51 | <i>LTBR</i>      | 3                           | rs2364484                | C/A     | A                                                 | A                |
|            | 52 | <i>MED4</i>      | 53                          | rs9534912                | T/C     | T                                                 | C                |
|            | 53 | <i>MFF</i>       | 29                          | rs7573035                | C/A     | A                                                 | A                |
|            | 54 | <i>MGAT4A</i>    | 4                           | rs13032507               | C/A     | C                                                 | A                |
|            | 55 | <i>MMRN1</i>     | 3                           | rs7693616                | T/G     | G                                                 | T                |

|             |    |                  |     |            |     |   |   |
|-------------|----|------------------|-----|------------|-----|---|---|
|             | 56 | <i>MOCOS</i>     | 5   | rs1893269  | G/C | C | C |
|             | 57 | <i>MTERFD2</i>   | 16  | rs3815291  | C/A | C | A |
|             | 58 | <i>MTRR</i>      | 32  | rs327588   | G/C | C | G |
|             | 59 | <i>MXRA7</i>     | 30  | rs11077850 | T/C | T | C |
|             | 60 | <i>MYEOV</i>     | 24  | rs7939250  | G/A | G | A |
|             | 61 | <i>MYH11</i>     | 18  | rs3851702  | T/C | C | G |
|             | 62 | <i>N4BP2</i>     | 1   | rs6824761  | C/A | A | A |
|             | 63 | <i>NLRP2</i>     | 5   | rs11667481 | G/A | A | G |
|             | 64 | <i>NMNAT3</i>    | 21  | rs4367021  | C/A | A | C |
|             | 65 | <i>NUDT2</i>     | 15  | rs1337593  | T/C | T | C |
|             | 66 | <i>OAS1</i>      | 70  | rs1293742  | T/C | T | A |
|             | 67 | <i>PAX8</i>      | 4   | rs2863243  | T/C | C | C |
|             | 68 | <i>PGM5</i>      | 52  | rs12685375 | T/C | C | C |
|             | 69 | <i>PHACS</i>     | 4   | rs7928485  | T/C | T | T |
|             | 70 | <i>PILRB</i>     | 2   | rs5015756  | T/C | T | C |
|             | 71 | <i>PJA2</i>      | 27  | rs12719109 | T/C | C | T |
|             | 72 | <i>PLXDC2</i>    | 3   | rs2038912  | T/C | T | C |
|             | 73 | <i>PPIC</i>      | 30  | rs30063    | G/A | G | T |
|             | 74 | <i>PPIL3</i>     | 2   | rs3731714  | T/C | T | G |
|             | 75 | <i>PRPF31</i>    | 19  | rs254259   | T/C | C | A |
|             | 76 | <i>PTER</i>      | 8   | rs7913889  | G/A | A | C |
|             | 77 | <i>RAMP1</i>     | 10  | rs7578855  | T/C | T | T |
|             | 78 | <i>RGS17</i>     | 19  | rs3870364  | G/A | A | G |
|             | 79 | <i>RPS6KA2</i>   | 24  | rs9356531  | G/A | G | A |
|             | 80 | <i>SCD5</i>      | 49  | rs2125171  | T/C | C | G |
|             | 81 | <i>SEMA4G</i>    | 20  | rs752974   | T/C | T | G |
|             | 82 | <i>SERPINB10</i> | 3   | rs967538   | T/G | G | T |
|             | 83 | <i>SERPINB6</i>  | 7   | rs7759176  | T/C | C | G |
|             | 84 | <i>SF1</i>       | 1   | rs563536   | T/C | C | T |
|             | 85 | <i>SLC39A8</i>   | 80  | rs151402   | G/A | A | A |
|             | 86 | <i>SNCA</i>      | 124 | rs6824979  | G/C | G | G |
|             | 87 | <i>SNHG5</i>     | 8   | rs12190637 | G/A | G | A |
|             | 88 | <i>STEAP2</i>    | 101 | rs42617    | T/A | T | T |
|             | 89 | <i>TBKBP1</i>    | 55  | rs1912483  | G/A | G | A |
|             | 90 | <i>TIMM10</i>    | 49  | rs514385   | T/C | T | C |
|             | 91 | <i>TIMM22</i>    | 3   | rs2586306  | T/A | T | A |
|             | 92 | <i>UBE3C</i>     | 8   | rs1182392  | T/C | T | G |
|             | 93 | <i>USP6</i>      | 61  | rs6502843  | G/A | A | A |
|             | 94 | <i>WBSCR27</i>   | 40  | rs13244770 | T/G | T | T |
|             | 95 | <i>WDR41</i>     | 109 | rs4704434  | G/A | A | A |
|             | 96 | <i>XRN2</i>      | 157 | rs804384   | G/A | A | G |
|             | 97 | <i>XYLT1</i>     | 7   | rs4238652  | T/C | C | C |
|             | 98 | <i>YPEL4</i>     | 44  | rs633129   | G/A | A | C |
|             | 99 | <i>ZNF544</i>    | 1   | rs260462   | G/A | A | G |
| <b>SKIN</b> |    |                  |     |            |     |   |   |
|             | 1  | <i>ACCN1</i>     | 2   | rs7207800  | A/G | G | A |
|             | 2  | <i>ACTC1</i>     | 4   | rs8039278  | T/G | G | T |
|             | 3  | <i>AGR3</i>      | 2   | rs17629719 | G/T | G | G |
|             | 4  | <i>ATP13A1</i>   | 102 | rs741706   | A/G | G | A |
|             | 5  | <i>C10ORF53</i>  | 1   | rs751595   | A/G | G | C |
|             | 6  | <i>C8ORF42</i>   | 1   | rs17665859 | C/T | T | T |
|             | 7  | <i>CACNA1H</i>   | 1   | rs2745167  | T/C | T | C |
|             | 8  | <i>CCL23</i>     | 28  | rs864104   | C/T | C | A |
|             | 9  | <i>CLLU10S</i>   | 4   | rs4760407  | T/C | T | C |
|             | 10 | <i>COPG2</i>     | 1   | rs10863    | A/G | A | G |
|             | 11 | <i>EEF1G</i>     | 1   | rs11231168 | T/C | T | C |
|             | 12 | <i>FLJ10916</i>  | 7   | rs1878809  | C/G | G | C |
|             | 13 | <i>FLJ35429</i>  | 1   | rs6457121  | G/A | A | G |
|             | 14 | <i>FLJ45964</i>  | 3   | rs6713353  | G/C | G | C |
|             | 15 | <i>FTHL7</i>     | 1   | rs7991197  | C/T | T | T |
|             | 16 | <i>GUCY1B2</i>   | 31  | rs9568497  | C/T | T | T |
|             | 17 | <i>HERC6</i>     | 7   | rs713175   | C/T | T | C |
|             | 18 | <i>LOC147650</i> | 2   | rs8102075  | A/G | A | G |

|            |    |                  |     |            |     |   |   |
|------------|----|------------------|-----|------------|-----|---|---|
|            | 19 | <i>LOC283398</i> | 1   | rs10859604 | A/G | A | A |
|            | 20 | <i>LOC643453</i> | 2   | rs4876979  | G/T | T | C |
|            | 21 | <i>LOC643747</i> | 2   | rs12301198 | G/A | A | A |
|            | 22 | <i>LOC644366</i> | 2   | rs3851781  | T/C | T | C |
|            | 23 | <i>LOC644889</i> | 3   | rs11024097 | G/A | G | C |
|            | 24 | <i>LOC645351</i> | 1   | rs7712944  | G/A | G | G |
|            | 25 | <i>LOC645797</i> | 9   | rs7481311  | A/G | G | C |
|            | 26 | <i>LOC647541</i> | 3   | rs2808788  | A/G | G | G |
|            | 27 | <i>LOC648226</i> | 11  | rs7850776  | C/T | C | C |
|            | 28 | <i>LOC652367</i> | 2   | rs860214   | C/T | T | G |
|            | 29 | <i>LOC653034</i> | 1   | rs231674   | T/C | C | C |
|            | 30 | <i>LOC653486</i> | 1   | rs3758653  | C/T | C | T |
|            | 31 | <i>LOC730684</i> | 2   | rs667470   | C/T | T | T |
|            | 32 | <i>LTBP3</i>     | 1   | rs2236684  | G/T | T | A |
|            | 33 | <i>MDGA1</i>     | 4   | rs7748388  | C/T | C | G |
|            | 34 | <i>MED4</i>      | 69  | rs9567986  | T/C | C | T |
|            | 35 | <i>MUC16</i>     | 1   | rs12459695 | C/G | G | G |
|            | 36 | <i>NOX3</i>      | 1   | rs11756851 | C/T | C | T |
|            | 37 | <i>NUPL1</i>     | 1   | rs9507399  | A/G | A | G |
|            | 38 | <i>PAX8</i>      | 5   | rs7589901  | C/T | T | A |
|            | 39 | <i>PECR</i>      | 12  | rs7570208  | C/A | C | G |
|            | 40 | <i>PKD1L2</i>    | 10  | rs9934926  | C/T | T | A |
|            | 41 | <i>SEMA4G</i>    | 18  | rs807029   | C/T | C | G |
|            | 42 | <i>SH2D4A</i>    | 7   | rs748208   | T/C | T | C |
|            | 43 | <i>SOX5</i>      | 1   | rs17468457 | C/T | T | T |
|            | 44 | <i>SPINK7</i>    | 95  | rs999741   | C/T | T | C |
|            | 45 | <i>TFG</i>       | 86  | rs9878163  | A/G | G | A |
|            | 46 | <i>TIMM10</i>    | 119 | rs7943793  | A/G | G | T |
|            | 47 | <i>TMEM25</i>    | 3   | rs573971   | G/A | A | A |
|            | 48 | <i>UNC45A</i>    | 8   | rs871078   | G/C | C | A |
|            | 49 | <i>UPK1A</i>     | 15  | rs4806197  | C/T | T | C |
|            | 50 | <i>USMG5</i>     | 27  | rs4918003  | C/G | G | T |
|            | 51 | <i>WDR41</i>     | 39  | rs7714170  | C/T | T | A |
|            | 52 | <i>WFIKKN1</i>   | 20  | rs7205409  | C/T | C | C |
|            | 53 | <i>XYLT1</i>     | 1   | rs1045885  | G/C | C | C |
|            | 54 | <i>ZNF365</i>    | 63  | rs7923561  | C/T | C | A |
|            | 55 | <i>ZNF418</i>    | 63  | rs9749429  | T/C | T | C |
|            | 56 | <i>ZNF713</i>    | 1   | rs4948003  | A/T | A | T |
| <b>FAT</b> |    |                  |     |            |     |   |   |
|            | 1  | <i>ADH4</i>      | 30  | rs7694844  | A/C | A | T |
|            | 2  | <i>AGTPBP1</i>   | 33  | rs918941   | C/T | T | G |
|            | 3  | <i>ATP13A1</i>   | 98  | rs968525   | A/T | T | C |
|            | 4  | <i>B4GALT4</i>   | 4   | rs4449310  | A/G | A | C |
|            | 5  | <i>BRWD2</i>     | 45  | rs9325569  | A/T | T | G |
|            | 6  | <i>CCL23</i>     | 13  | rs864104   | A/G | G | A |
|            | 7  | <i>CDK6</i>      | 3   | rs982692   | C/G | C | T |
|            | 8  | <i>CHST13</i>    | 5   | rs6786437  | C/A | C | C |
|            | 9  | <i>CLEC12A</i>   | 5   | rs7313235  | T/C | C | C |
|            | 10 | <i>CLUAP1</i>    | 2   | rs6501178  | A/C | A | A |
|            | 11 | <i>COG6</i>      | 1   | rs2180960  | T/G | G | G |
|            | 12 | <i>COPG2</i>     | 34  | rs992859   | A/G | A | C |
|            | 13 | <i>DAPL1</i>     | 2   | rs759033   | C/G | C | T |
|            | 14 | <i>DLG4</i>      | 4   | rs8067250  | C/G | G | C |
|            | 15 | <i>DMKN</i>      | 2   | rs6510492  | A/G | G | T |
|            | 16 | <i>DPYSL4</i>    | 23  | rs902627   | G/T | G | G |
|            | 17 | <i>DSEL</i>      | 8   | rs9946666  | C/T | T | T |
|            | 18 | <i>EIF3H</i>     | 1   | rs1695714  | G/T | T | A |
|            | 19 | <i>EMR2</i>      | 18  | rs8107048  | A/G | A | C |
|            | 20 | <i>FGA</i>       | 1   | rs1316990  | C/T | T | C |
|            | 21 | <i>FLJ10916</i>  | 7   | rs7425197  | C/G | G | C |
|            | 22 | <i>FTHL7</i>     | 1   | rs3945859  | G/T | G | T |
|            | 23 | <i>FUT4</i>      | 6   | rs596855   | A/G | G | C |

|    |                  |     |            |     |   |   |
|----|------------------|-----|------------|-----|---|---|
| 24 | <i>GUCA1C</i>    | 1   | rs9821923  | C/A | C | A |
| 25 | <i>HLA-DPB1</i>  | 29  | rs9469485  | T/G | T | C |
| 26 | <i>HLA-DRB1</i>  | 54  | rs9275141  | A/C | A | G |
| 27 | <i>HMHB1</i>     | 2   | rs17100749 | C/G | G | G |
| 28 | <i>IKZF1</i>     | 4   | rs6952409  | A/G | G | G |
| 29 | <i>IL1RN</i>     | 2   | rs315948   | T/C | T | G |
| 30 | <i>IL8</i>       | 18  | rs552582   | T/G | T | A |
| 31 | <i>IPO8</i>      | 21  | rs9300199  | C/T | T | T |
| 32 | <i>IRF5</i>      | 41  | rs7808907  | A/G | G | C |
| 33 | <i>ITGA4</i>     | 1   | rs13429032 | A/G | G | G |
| 34 | <i>KCTD10</i>    | 42  | rs9593     | C/T | ? | A |
| 35 | <i>KCTD12</i>    | 2   | rs9600792  | A/G | G | T |
| 36 | <i>KCTD8</i>     | 7   | rs7684615  | G/C | C | G |
| 37 | <i>LAIR2</i>     | 1   | rs4806747  | A/G | A | A |
| 38 | <i>LDHC</i>      | 65  | rs7946331  | C/G | G | G |
| 39 | <i>LEMD3</i>     | 65  | rs990609   | A/C | A | C |
| 40 | <i>LILRA2</i>    | 3   | rs1671176  | A/C | C | C |
| 41 | <i>LOC644366</i> | 3   | rs3851781  | C/T | C | C |
| 42 | <i>LOC644889</i> | 2   | rs1544506  | T/C | T | C |
| 43 | <i>LOC645460</i> | 1   | rs17762258 | G/A | G | A |
| 44 | <i>LOC646625</i> | 7   | rs9554219  | G/T | T | T |
| 45 | <i>LOC653034</i> | 1   | rs7225168  | G/T | T | G |
| 46 | <i>LRRC25</i>    | 6   | rs8101804  | G/A | A | C |
| 47 | <i>LZTS1</i>     | 1   | rs13264395 | G/C | G | C |
| 48 | <i>MAPK7</i>     | 3   | rs9911451  | A/T | A | A |
| 49 | <i>MARCH8</i>    | 81  | rs984955   | C/T | T | A |
| 50 | <i>MED4</i>      | 101 | rs9595825  | C/T | T | T |
| 51 | <i>MEGF9</i>     | 50  | rs991121   | C/T | T | G |
| 52 | <i>MFF</i>       | 14  | rs9646881  | A/C | C | G |
| 53 | <i>MGC12965</i>  | 5   | rs682229   | T/C | C | A |
| 54 | <i>MOCOS</i>     | 2   | rs604271   | G/A | G | A |
| 55 | <i>MYH1</i>      | 50  | rs995362   | T/C | T | G |
| 56 | <i>NUDT2</i>     | 15  | rs4480190  | C/G | C | C |
| 57 | <i>PAX8</i>      | 14  | rs895417   | T/C | T | A |
| 58 | <i>PLIN</i>      | 1   | rs16942690 | G/A | G | A |
| 59 | <i>PMP2</i>      | 1   | rs13261227 | A/G | G | C |
| 60 | <i>PPIL3</i>     | 5   | rs7582581  | A/G | G | T |
| 61 | <i>PRPF31</i>    | 11  | rs42318    | G/A | A | G |
| 62 | <i>PTCHD3</i>    | 39  | rs7342136  | A/G | A | T |
| 63 | <i>PTER</i>      | 2   | rs2298126  | A/C | C | A |
| 64 | <i>RAB37</i>     | 2   | rs3850121  | T/C | C | G |
| 65 | <i>RIMS2</i>     | 37  | rs4734094  | T/A | A | G |
| 66 | <i>RNF126P1</i>  | 14  | rs9303389  | G/C | G | G |
| 67 | <i>RPL14</i>     | 127 | rs9968170  | T/C | C | T |
| 68 | <i>SEMA4G</i>    | 30  | rs807029   | C/T | C | G |
| 69 | <i>SFTPD</i>     | 52  | rs9421727  | C/T | C | T |
| 70 | <i>SILV</i>      | 4   | rs3213122  | A/G | A | C |
| 71 | <i>SLC39A8</i>   | 51  | rs9705     | A/G | G | G |
| 72 | <i>STMN2</i>     | 15  | rs4305892  | A/G | A | T |
| 73 | <i>TFG</i>       | 109 | rs989795   | A/G | G | T |
| 74 | <i>TIMM10</i>    | 162 | rs929934   | A/G | G | G |
| 75 | <i>TRPC4AP</i>   | 17  | rs6120827  | T/G | T | T |
| 76 | <i>USMG5</i>     | 26  | rs7913461  | C/G | C | A |
| 77 | <i>WBSCR27</i>   | 31  | rs8629     | G/C | C | C |
| 78 | <i>WDR41</i>     | 5   | rs335655   | C/A | C | G |
| 79 | <i>ZNF232</i>    | 87  | rs9912506  | A/G | A | G |
