# Supplementary material
Source: PubMed Central journal article supplement (PMC3914615)
Supplement: 838ad16843c062fb60bb4a0fc185a9ee_genetics.113.157503-4.pdf [file 838ad16843c062fb60bb4a0fc185a9ee_genetics.113.157503-4.pdf]

**Table S2 (A) P-values of Kolmogorov-Smirnov (K-S) test of pairwise comparison between groups in the RMD distribution and basic descriptive statistics for the RMD values.** Upper diagonal P-values are from randomly selected non-evQTL genes. Results obtained from the Box-Cox normalized and not normalized data are given. **(B) The per-probe statistics of RMD values for larger variance groups (MZ-L and DZ-L).** Probes with no SNP in either groups are not shown.

| <b>A Log2-transformed data</b>                  |          |          |          |          |
|-------------------------------------------------|----------|----------|----------|----------|
|                                                 | MZ-S     | DZ-S     | MZ-L     | DZ-L     |
| MZ-S                                            | -        | 0.40     | 0.031    | 2.94e-04 |
| DZ-S                                            | 9.34e-06 | -        | 0.033    | 0.026    |
| MZ-L                                            | 8.82e-18 | 1.66e-06 | -        | 0.16     |
| DZ-L                                            | 1.40e-78 | 1.66e-52 | 7.28e-22 | -        |
| <b>Box-Cox normalized log2-transformed data</b> |          |          |          |          |
|                                                 | MZ-S     | DZ-S     | MZ-L     | DZ-L     |
| MZ-S                                            | -        | 0.1670   | 4.49e-08 | 1.98e-14 |
| DZ-S                                            | 0.0486   | -        | 9.60e-11 | 8.30e-20 |
| MZ-L                                            | 1.59e-68 | 1.57e-80 | -        | 0.0333   |
| DZ-L                                            | 2.97e-85 | 1.69e-99 | 1.84e-07 | -        |

| <b>B</b>     | Probe | RMD in MZ-L and DZ-L groups |        |        |           |        |        |
|--------------|-------|-----------------------------|--------|--------|-----------|--------|--------|
|              |       | MZ-L                        |        |        | DZ-L      |        |        |
|              |       | # of SNPs                   | Mean   | Median | # of SNPs | Mean   | Median |
| ILMN_1658247 | 37    | 0.0126                      | 0.0103 | 47     | 0.0366    | 0.0150 |        |
| ILMN_1660086 | 75    | 0.0127                      | 0.0091 | 84     | 0.0180    | 0.0123 |        |
| ILMN_1664641 | 6     | 0.0062                      | 0.0060 | 31     | 0.0131    | 0.0106 |        |
| ILMN_1667229 | 24    | 0.0138                      | 0.0098 | 25     | 0.0212    | 0.0129 |        |
| ILMN_1669032 | 62    | 0.0142                      | 0.0098 | 44     | 0.0178    | 0.0175 |        |
| ILMN_1670841 | 6     | 0.0048                      | 0.0047 | 3      | 0.0135    | 0.0180 |        |
| ILMN_1675616 | 36    | 0.0102                      | 0.0094 | 39     | 0.0111    | 0.0101 |        |
| ILMN_1676528 | 41    | 0.0127                      | 0.0083 | 45     | 0.0332    | 0.0181 |        |
| ILMN_1676575 | 29    | 0.0118                      | 0.0108 | 35     | 0.0255    | 0.0167 |        |
| ILMN_1677124 | 31    | 0.0079                      | 0.0042 | 29     | 0.0141    | 0.0144 |        |
| ILMN_1678974 | 50    | 0.0115                      | 0.0085 | 28     | 0.0175    | 0.0148 |        |
| ILMN_1682034 | 124   | 0.0100                      | 0.0083 | 178    | 0.0112    | 0.0086 |        |
| ILMN_1696537 | 16    | 0.0139                      | 0.0101 | 5      | 0.0090    | 0.0047 |        |
| ILMN_1701933 | 27    | 0.0204                      | 0.0176 | 31     | 0.0325    | 0.0238 |        |
| ILMN_1704598 | 4     | 0.0114                      | 0.0119 | 2      | 0.0145    | 0.0145 |        |
| ILMN_1706959 | 32    | 0.0068                      | 0.0051 | 35     | 0.0115    | 0.0083 |        |
| ILMN_1707137 | 9     | 0.0128                      | 0.0089 | 7      | 0.0251    | 0.0083 |        |
| ILMN_1709173 | 6     | 0.0093                      | 0.0090 | 2      | 0.0041    | 0.0041 |        |
| ILMN_1709590 | 19    | 0.0172                      | 0.0114 | 6      | 0.0126    | 0.0114 |        |
| ILMN_1712400 | 7     | 0.0101                      | 0.0084 | 10     | 0.0261    | 0.0237 |        |
| ILMN_1713803 | 9     | 0.0109                      | 0.0129 | 7      | 0.0205    | 0.0090 |        |
| ILMN_1715169 | 20    | 0.0214                      | 0.0162 | 11     | 0.0323    | 0.0264 |        |
| ILMN_1715693 | 75    | 0.0112                      | 0.0090 | 69     | 0.0173    | 0.0130 |        |
| ILMN_1716218 | 11    | 0.0119                      | 0.0125 | 9      | 0.0148    | 0.0071 |        |
| ILMN_1718932 | 111   | 0.0148                      | 0.0106 | 143    | 0.0277    | 0.0151 |        |
| ILMN_1719170 | 31    | 0.0087                      | 0.0075 | 28     | 0.0149    | 0.0115 |        |
| ILMN_1719204 | 50    | 0.0067                      | 0.0064 | 53     | 0.0130    | 0.0075 |        |
| ILMN_1721727 | 29    | 0.0117                      | 0.0079 | 21     | 0.0233    | 0.0131 |        |
| ILMN_1723984 | 41    | 0.0109                      | 0.0093 | 43     | 0.0095    | 0.0076 |        |
| ILMN_1724480 | 47    | 0.0108                      | 0.0083 | 35     | 0.0206    | 0.0171 |        |
| ILMN_1726624 | 11    | 0.0088                      | 0.0101 | 8      | 0.0175    | 0.0116 |        |
| ILMN_1743836 | 2     | 0.0077                      | 0.0077 | 20     | 0.0089    | 0.0087 |        |
| ILMN_1745043 | 11    | 0.0064                      | 0.0040 | 8      | 0.0120    | 0.0112 |        |
| ILMN_1749070 | 12    | 0.0082                      | 0.0081 | 9      | 0.0129    | 0.0111 |        |
| ILMN_1751559 | 14    | 0.0124                      | 0.0087 | 11     | 0.0096    | 0.0066 |        |
| ILMN_1752150 | 7     | 0.0176                      | 0.0155 | 7      | 0.0120    | 0.0116 |        |
| ILMN_1753164 | 49    | 0.0079                      | 0.0062 | 46     | 0.0260    | 0.0085 |        |
| ILMN_1753312 | 26    | 0.0151                      | 0.0118 | 29     | 0.0145    | 0.0117 |        |

|              |     |        |        |     |        |        |
|--------------|-----|--------|--------|-----|--------|--------|
| ILMN_1756579 | 41  | 0.0079 | 0.0055 | 33  | 0.0090 | 0.0065 |
| ILMN_1764754 | 35  | 0.0096 | 0.0070 | 27  | 0.0179 | 0.0128 |
| ILMN_1765274 | 24  | 0.0114 | 0.0085 | 17  | 0.0150 | 0.0103 |
| ILMN_1765332 | 38  | 0.0088 | 0.0067 | 42  | 0.0199 | 0.0171 |
| ILMN_1766165 | 27  | 0.0118 | 0.0077 | 31  | 0.0141 | 0.0119 |
| ILMN_1778347 | 21  | 0.0084 | 0.0088 | 10  | 0.0132 | 0.0089 |
| ILMN_1778488 | 14  | 0.0069 | 0.0070 | 14  | 0.0141 | 0.0052 |
| ILMN_1780601 | 8   | 0.0166 | 0.0132 | 7   | 0.0133 | 0.0117 |
| ILMN_1781388 | 19  | 0.0155 | 0.0119 | 6   | 0.0212 | 0.0121 |
| ILMN_1784294 | 32  | 0.0149 | 0.0111 | 31  | 0.0218 | 0.0195 |
| ILMN_1787199 | 62  | 0.0077 | 0.0059 | 53  | 0.0083 | 0.0065 |
| ILMN_1795336 | 52  | 0.0080 | 0.0045 | 54  | 0.0209 | 0.0107 |
| ILMN_1809496 | 27  | 0.0108 | 0.0099 | 17  | 0.0153 | 0.0098 |
| ILMN_1813746 | 18  | 0.0173 | 0.0118 | 13  | 0.0237 | 0.0177 |
| ILMN_1835359 | 9   | 0.0125 | 0.0104 | 3   | 0.0232 | 0.0180 |
| ILMN_1836218 | 29  | 0.0090 | 0.0080 | 31  | 0.0147 | 0.0088 |
| ILMN_1851610 | 2   | 0.0029 | 0.0029 | 22  | 0.0079 | 0.0056 |
| ILMN_1854132 | 13  | 0.0102 | 0.0081 | 10  | 0.0077 | 0.0055 |
| ILMN_1864228 | 1   | 0.0141 | 0.0141 | 11  | 0.0123 | 0.0064 |
| ILMN_1885273 | 14  | 0.0124 | 0.0095 | 6   | 0.0116 | 0.0088 |
| ILMN_1897741 | 12  | 0.0090 | 0.0075 | 8   | 0.0296 | 0.0290 |
| ILMN_1900622 | 1   | 0.0047 | 0.0047 | 1   | 0.0024 | 0.0024 |
| ILMN_1900994 | 10  | 0.0062 | 0.0033 | 5   | 0.0086 | 0.0075 |
| ILMN_1904238 | 53  | 0.0120 | 0.0091 | 46  | 0.0192 | 0.0141 |
| ILMN_2086222 | 61  | 0.0140 | 0.0116 | 61  | 0.0119 | 0.0090 |
| ILMN_2120982 | 4   | 0.0167 | 0.0157 | 7   | 0.0111 | 0.0080 |
| ILMN_2134224 | 15  | 0.0086 | 0.0086 | 7   | 0.0067 | 0.0039 |
| ILMN_2147424 | 21  | 0.0124 | 0.0101 | 24  | 0.0239 | 0.0187 |
| ILMN_2154287 | 3   | 0.0294 | 0.0370 | 1   | 0.0061 | 0.0061 |
| ILMN_2173294 | 45  | 0.0062 | 0.0049 | 28  | 0.0147 | 0.0095 |
| ILMN_2181363 | 20  | 0.0141 | 0.0106 | 12  | 0.0074 | 0.0034 |
| ILMN_2183938 | 20  | 0.0220 | 0.0172 | 11  | 0.0441 | 0.0346 |
| ILMN_2196479 | 14  | 0.0129 | 0.0090 | 13  | 0.0197 | 0.0128 |
| ILMN_2198408 | 15  | 0.0196 | 0.0148 | 11  | 0.0237 | 0.0209 |
| ILMN_2200659 | 109 | 0.0069 | 0.0058 | 131 | 0.0146 | 0.0091 |
| ILMN_2223922 | 4   | 0.0104 | 0.0116 | 1   | 0.0088 | 0.0088 |
| ILMN_2233539 | 55  | 0.0192 | 0.0135 | 58  | 0.0266 | 0.0151 |
| ILMN_2237428 | 10  | 0.0134 | 0.0115 | 5   | 0.0129 | 0.0075 |
| ILMN_2246083 | 53  | 0.0247 | 0.0188 | 40  | 0.0299 | 0.0257 |
| ILMN_2262288 | 91  | 0.0079 | 0.0046 | 113 | 0.0153 | 0.0096 |
