# Supplementary material
Source: PubMed Central journal article supplement (PMC3914615)
Supplement: ac0eb574adef491340dccdcc593fc914_genetics.113.157503-6.pdf [file ac0eb574adef491340dccdcc593fc914_genetics.113.157503-6.pdf]

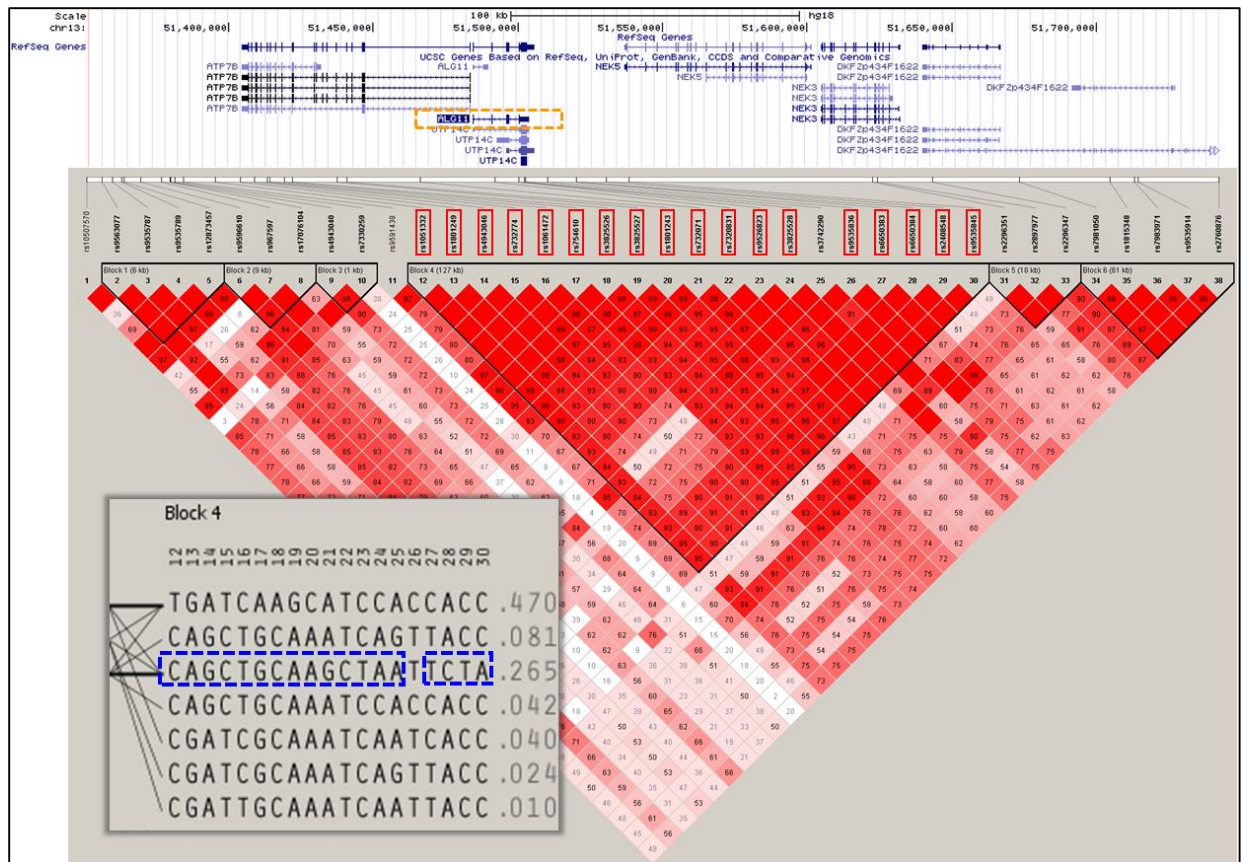

**Figure S2** Linkage disequilibrium patterns of the genomic region surrounding eVTL at *ALG11*. The entire region of the analysis included 38 SNPs over a ~400 kb span. The *cis*-evSNPs are indicated with red boxes. The haplotypes in the LD block accommodating evSNPs are displayed in insert, with corresponding haplotype frequencies. Of note, alleles of evSNPs resulting in larger variance of gene expression are allocated in one haplotype highlighted with blue box.
