# Supplementary material
Source: PubMed Central journal article supplement (PMC3914615)
Supplement: ccb1c97cdca481257de8867bd605eb08_genetics.113.157503-8.pdf [file ccb1c97cdca481257de8867bd605eb08_genetics.113.157503-8.pdf]

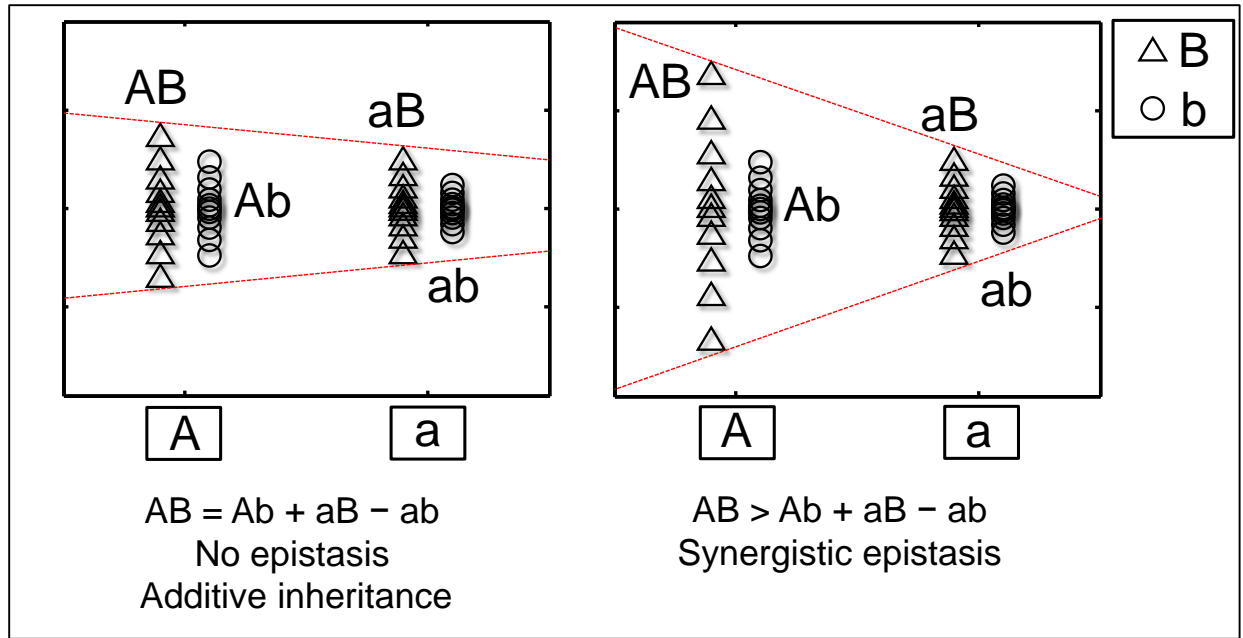

**Figure S5** Schematic shows that both additive (left) and epistatic (right) effects reate similar evQTL signals. “A” and “a” are two alleles of evSNP, while “B” and “b” are alleles of interacting SNP.
