# Supplementary material
Source: PubMed Central journal article supplement (PMC3914615)
Supplement: df103e28959357d418519fd52e4dbc37_genetics.113.157503-2.pdf [file df103e28959357d418519fd52e4dbc37_genetics.113.157503-2.pdf]

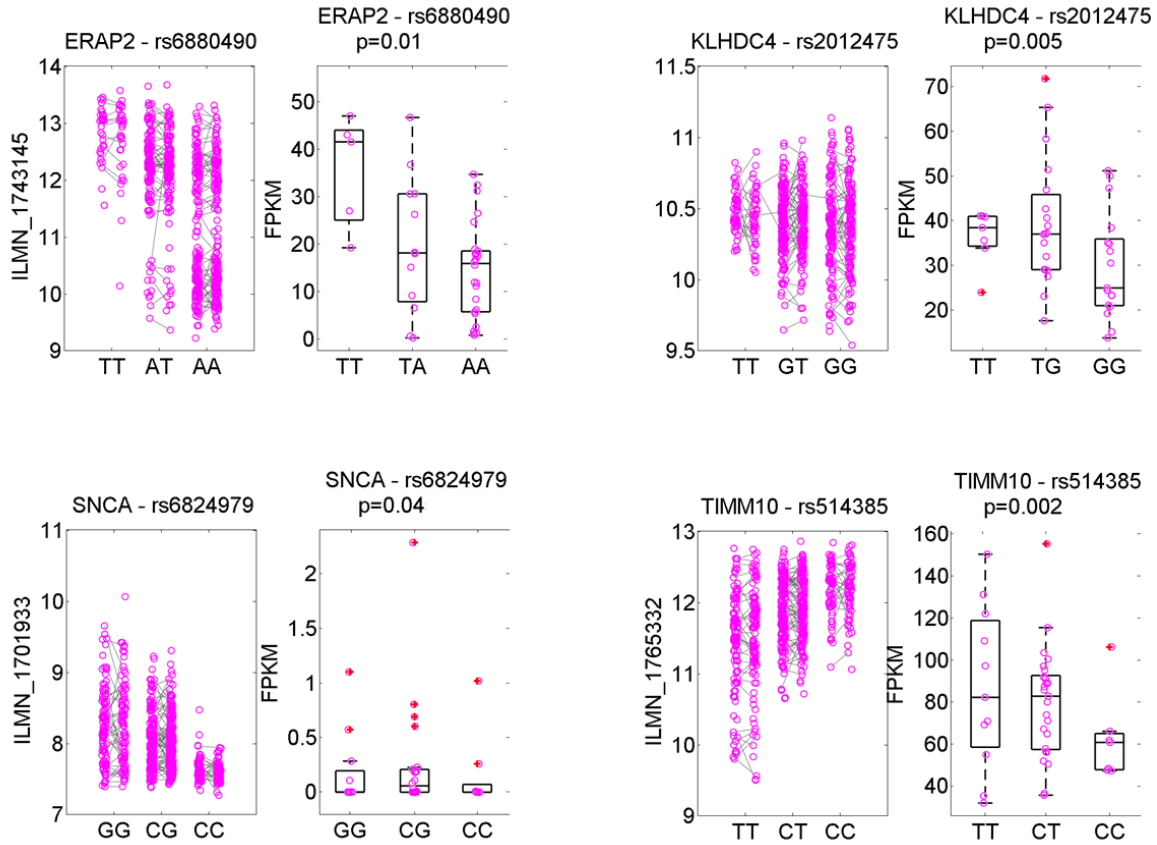

**Figure S4** Comparison between eQTLs depicted using TwinsUK samples (left) and those of the same gene-SNP pairs depicted using RNA-seq data (MONTGOMERY et al. 2010) and the 1,000 Genomes Project genotype data (THE-1000-GENOMES-PROJECT-CONSORTIUM et al. 2012) (right). *P*-value of Levene's test for the equality of variances for expression levels calculated for two homozygous genotype groups is shown in the subtitle of the right panel in each figure.
