# Supplementary material
Source: PubMed Central journal article supplement (PMC3914615)
Supplement: e9e68d6591618b4a8a256466da880a71_genetics.113.157503-10.pdf [file e9e68d6591618b4a8a256466da880a71_genetics.113.157503-10.pdf]

**Table S3 LCL evQTLs and interacting SNPs. P-value indicates the linear regression significance between interacting SNP genotype and gene expression of evQTL gene (see Methods). Two genes close to interacting SNPs at *trans*-genomic location are given.**

| LCL evQTL gene   | evSNP      | evSNP position  | Interacting SNP | Interacting SNP position | P-value  | <i>trans</i> -located gene |
|------------------|------------|-----------------|-----------------|--------------------------|----------|----------------------------|
| <i>PTER</i>      | rs7913889  | chr10:16559381  | rs7909832       | chr10:16556710           | 8.66E-77 |                            |
| <i>ERAP2</i>     | rs6880490  | chr5:96185549   | rs11135484      | chr5:96221889            | 4.76E-45 |                            |
| <i>BBS2</i>      | rs14306    | chr16:56510299  | rs13337155      | chr16:56504724           | 5.77E-39 |                            |
| <i>IPO8</i>      | rs1371053  | chr12:30845705  | rs7968343       | chr12:30817004           | 6.16E-38 |                            |
| <i>WDR41</i>     | rs4704434  | chr5:76890568   | rs441102        | chr5:76738970            | 4.31E-33 |                            |
| <i>SEMA4G</i>    | rs752974   | chr10:102762256 | rs12571302      | chr10:102742763          | 4.13E-32 |                            |
| <i>N4BP2</i>     | rs6824761  | chr4:40054818   | rs4974962       | chr4:40115239            | 4.92E-29 |                            |
| <i>PPIL3</i>     | rs3731714  | chr2:202060820  | rs7606251       | chr2:201736734           | 7.47E-28 |                            |
| <i>PILRB</i>     | rs5015756  | chr7:100013457  | rs7341507       | chr7:99951315            | 9.06E-27 |                            |
| <i>TIMM10</i>    | rs514385   | chr11:57306011  | rs3851118       | chr11:57280951           | 1.36E-23 |                            |
| <i>LOC440160</i> | rs12052294 | chr2:132433268  | rs6720375       | chr2:132440073           | 1.15E-21 |                            |
| <i>C12ORF28</i>  | rs775439   | chr12:70096374  | rs811822        | chr12:70107646           | 1.35E-20 |                            |
| <i>TIMM22</i>    | rs2586306  | chr17:909451    | rs2241931       | chr17:909653             | 2.05E-20 |                            |
| <i>SERPINB10</i> | rs967538   | chr18:61509075  | rs6567399       | chr18:61544546           | 1.60E-19 |                            |
| <i>BTN3A2</i>    | rs742090   | chr6:26415637   | rs3799378       | chr6:26404374            | 4.29E-19 |                            |
| <i>SCD5</i>      | rs2125171  | chr4:83835698   | rs6830527       | chr4:83798446            | 7.00E-18 |                            |
| <i>GOLPH4</i>    | rs13100726 | chr3:167707035  | rs9873288       | chr3:167726096           | 2.77E-17 |                            |
| <i>NUDT2</i>     | rs1337593  | chr9:34334015   | rs7032924       | chr9:34167694            | 2.59E-16 |                            |
| <i>LOC642290</i> | rs7255207  | chr19:28385923  | rs7258333       | chr19:28269920           | 8.94E-16 |                            |
| <i>NMNAT3</i>    | rs4367021  | chr3:139420218  | rs9822952       | chr3:139385257           | 1.44E-15 |                            |
| <i>IRF5</i>      | rs10156169 | chr7:128684571  | rs8043          | chr7:128607384           | 9.33E-15 |                            |
| <i>IKZF1</i>     | rs7789635  | chr7:50473610   | rs10216316      | chr7:50462418            | 5.65E-14 |                            |
| <i>C12ORF54</i>  | rs2731094  | chr12:48881661  | rs12318285      | chr12:48905575           | 8.20E-14 |                            |
| <i>LEMDD3</i>    | rs11175680 | chr12:65605539  | rs2133323       | chr12:65577453           | 1.16E-13 |                            |
| <i>MTRR</i>      | rs327588   | chr5:7908359    | rs1801394       | chr5:7870973             | 1.40E-12 |                            |
| <i>WBSCR27</i>   | rs13244770 | chr7:73280691   | rs4440516       | chr7:73224041            | 3.61E-12 |                            |
| <i>XYLT1</i>     | rs4238652  | chr16:17199665  | rs7190386       | chr16:17183373           | 4.25E-12 |                            |
| <i>ITIH4</i>     | rs2240915  | chr3:52859526   | rs17331178      | chr3:52847544            | 5.13E-12 |                            |
| <i>ATP13A1</i>   | rs4808964  | chr19:19603692  | rs2304128       | chr19:19746151           | 1.18E-11 |                            |
| <i>KLHDC4</i>    | rs2012475  | chr16:87760814  | rs2290019       | chr16:87741662           | 2.95E-11 |                            |
| <i>HCLS1</i>     | rs4472078  | chr3:121477634  | rs12493927      | chr3:121378927           | 7.57E-11 |                            |
| <i>MTERFD2</i>   | rs3815291  | chr2:242032540  | rs7559967       | chr2:242006736           | 8.75E-10 |                            |
| <i>HCG22</i>     | rs1064191  | chr6:31075375   | rs2523857       | chr6:31021504            | 2.12E-09 |                            |
| <i>LOC650557</i> | rs1980495  | chr6:32346794   | rs3129878       | chr6:32408735            | 3.03E-09 |                            |
| <i>CDCP1</i>     | rs6441894  | chr3:45206579   | rs7633169       | chr3:45185519            | 1.21E-08 |                            |
| <i>HLA-DPB1</i>  | rs9277341  | chr6:33039625   | rs9501259       | chr6:33055551            | 1.15E-07 |                            |
| <i>LDHC</i>      | rs3993291  | chr11:18479739  | rs4757662       | chr11:18439738           | 1.19E-07 |                            |
| <i>AXIN2</i>     | rs740026   | chr17:63561681  | rs757558        | chr17:63561592           | 1.25E-07 |                            |
| <i>FLJ10916</i>  | rs4246598  | chr2:88438050   | rs2970924       | chr2:88433305            | 2.24E-07 |                            |
| <i>MED4</i>      | rs9534912  | chr13:48588564  | rs9526455       | chr13:48712474           | 2.62E-07 |                            |
| <i>RPS6KA2</i>   | rs9356531  | chr6:167276965  | rs9355601       | chr6:167269159           | 3.29E-07 |                            |
| <i>C16ORF30</i>  | rs2076441  | chr16:1590576   | rs2235643       | chr16:1585115            | 1.76E-06 |                            |
| <i>PLXDC2</i>    | rs2038912  | chr10:20207349  | rs1326233       | chr10:20238864           | 2.64E-06 |                            |
| <i>UBE3C</i>     | rs1182392  | chr7:157036200  | rs10271990      | chr7:157037521           | 3.76E-06 |                            |
| <i>SERPINB6</i>  | rs7759176  | chr6:2915664    | rs7751676       | chr6:2931879             | 6.59E-06 |                            |
| <i>COPG2</i>     | rs12706942 | chr7:130149061  | rs10128         | chr7:130151694           | 7.90E-06 |                            |
| <i>EIF5A</i>     | rs7220464  | chr17:7210836   | rs11078672      | chr17:7215142            | 9.29E-06 |                            |
| <i>ALG11</i>     | rs9526819  | chr13:52563475  | rs3742289       | chr13:52603194           | 2.63E-05 |                            |
| <i>SLC39A8</i>   | rs151402   | chr4:103190486  | rs151372        | chr4:103174196           | 2.65E-05 |                            |
| <i>HMMH1</i>     | rs17100739 | chr5:143112574  | rs10498677      | chr6:11466011            | 3.20E-05 | <i>TMEM170B</i>            |
| <i>COX4NB</i>    | rs301164   | chr16:85813880  | rs9923691       | chr16:85824190           | 6.63E-05 |                            |
| <i>CPNE1</i>     | rs224354   | chr20:34054609  | rs1118233       | chr20:34228349           | 7.84E-05 |                            |
| <i>YPEL4</i>     | rs633129   | chr11:57685196  | rs12790660      | chr11:57667222           | 9.68E-05 |                            |
| <i>PRPF31</i>    | rs254259   | chr19:54606405  | rs16985368      | chr19:54614590           | 1.17E-04 |                            |
| <i>C7ORF28B</i>  | rs10242703 | chr7:6870635    | rs2792574       | chr14:48676427           | 2.86E-04 | <i>MDGA2</i>               |
| <i>CPA4</i>      | rs6953940  | chr7:129947007  | rs3807344       | chr7:129934219           | 4.33E-04 |                            |
