# Supplementary material
Source: PubMed Central journal article supplement (PMC3914615)
Supplement: f5096b40209293da638cd4b6d4f2e7e4_genetics.113.157503-9.pdf [file f5096b40209293da638cd4b6d4f2e7e4_genetics.113.157503-9.pdf]

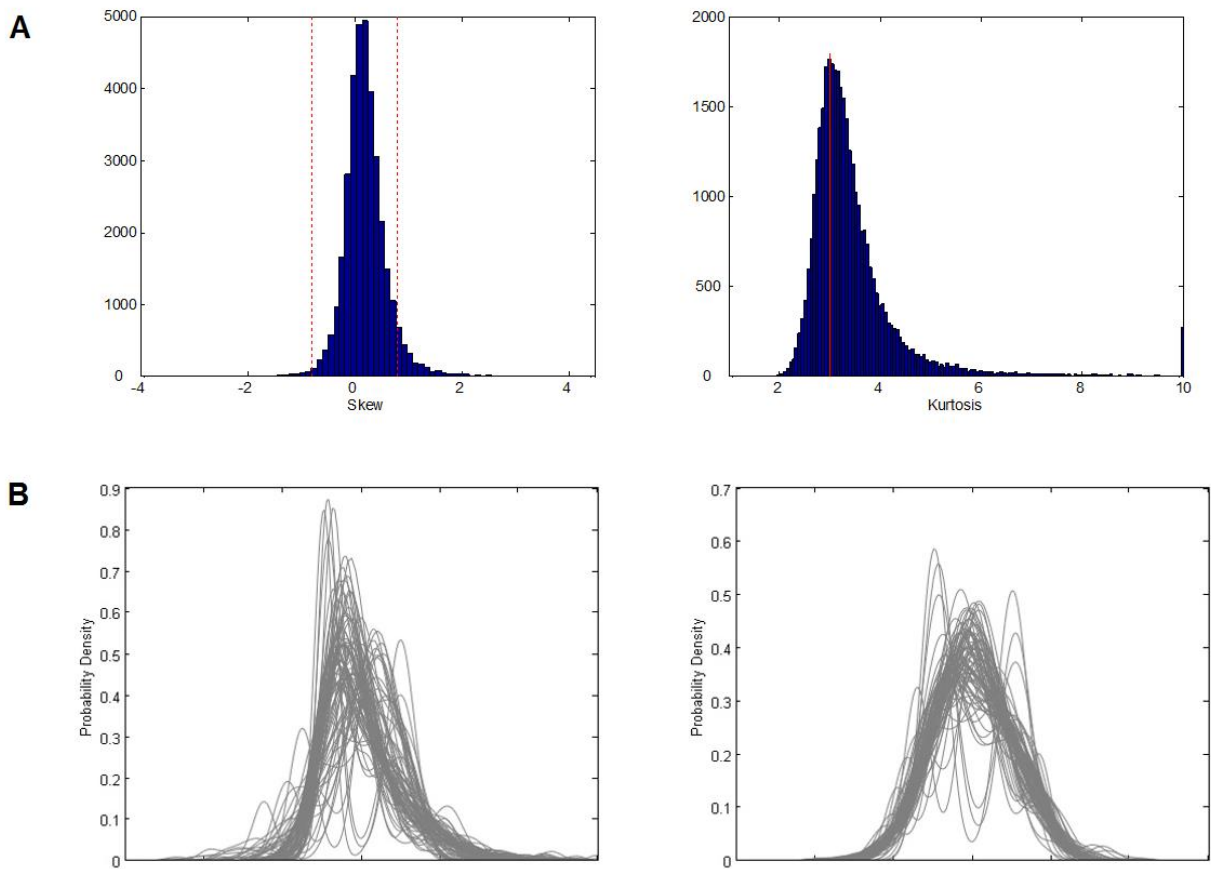

**Figure S1** Normality of expression data measured in LCLs. **(A)** Distributions of skewness and kurtosis. Red dashed lines indicate -0.8 and +0.8 skewness; red solid line indicates kurtosis = 3. **(B)** Profile distributions of expression data for selected probes (i.e., probes involved in evQTLs). (Left) Quantile-normalized expression data; (Right) Box-Cox normalized expression data.
